# Supplementary material
Source: publisher figshare collection journal article supplement (https://acs.figshare.com/ndownloader/files/4782709)
Supplement: Supplementary file 1 [file 4782709]

# Macrocycle Ring Expansion by Double Stevens Rearrangement

K. K. Ellis-Holder, B. P. Peppers, A. Y. Kovalevsky and  
Steven T. Diver\*

*Department of Chemistry, University at Buffalo-SUNY, Amherst, NY,  
14260-3000*

## SUPPORTING INFORMATION

### Table of Contents

|                                                                        |     |
|------------------------------------------------------------------------|-----|
| A. General Experimental                                                | S2  |
| B. Experimental Procedures                                             | S3  |
| C. NMR Spectra                                                         |     |
| 1. $^1\text{H}$ and $^{13}\text{C}$ NMR Data for Compounds <b>2-3</b>  | S8  |
| 2. $^1\text{H}$ and $^{13}\text{C}$ NMR Data for Compounds <b>7-9A</b> | S16 |

## General Experimental

Reactions were conducted under argon atmosphere unless otherwise noted. Benzene was distilled from  $\text{CaH}_2$  immediately prior to use. Xylene (mixture of isomers) was distilled from  $\text{CaH}_2$  and stored over 4 Å molecular sieves. GC mass spectra were obtained on a benchtop HP gc/mass spectrometer.  $^1\text{H}$  NMR and  $^{13}\text{C}$  NMR were recorded in  $\text{CDCl}_3$  or acetone- $d_6$  at the indicated frequency.  $^1\text{H}$  NMR spectra were referenced at 0 ppm on the TMS signal and  $^{13}\text{C}$  NMR spectra were referenced at 77.0 ppm for  $\text{CDCl}_3$ . Spectra in acetone- $d_6$  were referenced at the residual acetone signal which was at 2.04 ppm and 206.0 ppm for  $^1\text{H}$  and  $^{13}\text{C}$  NMR, respectively. Ethyl diazomalonate,<sup>1</sup> 1,3-bis(methoxy)-2-imidazolidinone,<sup>2</sup> 1,3-bis(methoxy)-2-benzimidazolidinone<sup>3</sup> and dithiols were synthesized by literature methods.

---

<sup>1</sup> Regitz, M.; Liedhegener, A., *Chem. Berichte* **1966**, 99, 3128-4.

<sup>2</sup> Petersen, H.; Reuther, W. *Liebigs Ann.* **1972**, 766, 58.

<sup>3</sup> Zinner, H.; Spangenberg, B. *Liebigs Ann.* **1958**, 91, 1432.

#### 4, 11-Dithiabenzimidazolophane 2A

A 1 L 2-necked rb flask equipped with a reflux condensor, magnetic stir bar and an addition funnel was charged with 12 g (36 mmol) of 3,10-dithia-benzimidazolophane **1A**,<sup>4</sup> 790 mg (1.8 mmol) of Rh<sub>2</sub>(OAc)<sub>4</sub> and 350 mL xylenes and brought to reflux under an argon atmosphere. The addition funnel was loaded with 14 g (76 mmol) of diethyl-diazomalonate in 50 mL xylenes and this was added over a period of 1.5 h to the h. After addition was complete, refluxing was continued for another 2h at which time TLC indicated full consumption of starting materials. Solvents were removed *in vacuo* and the crude mass was loaded onto a silica gel column. The product was eluted with 25%/25%/50% v/v/v ethyl acetate-chloroform-hexanes to give 12 g **2A** (51%) as a white solid. Crystals of **2A** were obtained by slow evaporation from CH<sub>2</sub>Cl<sub>2</sub> and diethyl ether, mp 160°C. <sup>1</sup>H NMR (500 MHz, CDCl<sub>3</sub>, ppm) 7.22 – 7.18 (m, 6H), 6.06 (br s, 2H), 4.85 (br d, *J* = 76 Hz, 4H), 4.44 – 4.30 (m, 8H), 3.72 (d, *J* = 15.5 Hz, 2H), 3.01 (br d, *J* = 15 Hz, 2H), 1.39 – 1.34 (m, 12H). <sup>13</sup>C NMR (125.7 MHz, CDCl<sub>3</sub>, ppm) 169.4, 167.5, 151.6, 132.63, 129.2 (broad signal), 128.9 121.6 (CH), 108.2 (CH), 63.0 (CH<sub>2</sub>), 62.9 (CH<sub>2</sub>), 42.7, 39.2 (broad signal), 14.0 (CH<sub>3</sub>), 13.9 (CH<sub>3</sub>). FT-IR (thin film, cm<sup>-1</sup>) 2982, 2936, 1725, 1619, 1517, 1494, 1424, 1388, 1367, 1245, 1201, 1157, 1095, 1027, 860, 816. High resolution MS (EI, *m/z*): anal calcd for C<sub>31</sub>H<sub>36</sub>N<sub>2</sub>S<sub>2</sub>O<sub>9</sub>: 644.1862; found: 644.1817, error: 7 ppm. Elemental analysis, calculated: C, 57.8; H, 5.6; N, 4.3%; found: C, 57.7; H, 5.6; N, 4.3%.

Crystals of **2A** were subjected to x-ray analysis. See attached cif file.

#### 4, 11-Dithiabenzimidazolophane 2B

A 50 mL Schlenk flask equipped with a coldfinger condenser, magnetic stir bar and a rubber septum was charged with 70 mg (0.2 mmol) dithiabenzimidazolophane **1B**,<sup>4</sup> 2.2 mg (0.005 mmol) of Rh<sub>2</sub>(OAc)<sub>4</sub> and 2 mL xylenes and brought to reflux under an argon atmosphere. Diethyl diazomalonate (112 mg, 0.6 mmol) was dissolved in 2 mL xylenes and this solution was added over a period of 1.5 h to the reaction mixture. After addition was complete, reflux was continued for another 2 h at which point TLC indicated full consumption of starting materials. Solvents were removed *in vacuo* and the crude mass was loaded onto a silica gel column (1 cm x 4 cm). The product was eluted with 1:3 ethyl acetate:hexanes to give 78 mg of a colorless oil which yielded 56 mg **2B** (42%) as a white solid upon trituration with diethyl ether from a dichloromethane solution, mp 179-180°C. Analytical TLC (20% ethyl acetate/hexanes) R<sub>f</sub> 0.25. <sup>1</sup>H-NMR (500 MHz, CDCl<sub>3</sub>, ppm) δ 7.18 – 7.15 (m, 2H), 7.10 – 7.06 (m, 2H), 6.94 – 6.94 (br m, 2H), 6.74 (br s, 1H), 5.00 (br d, *J* = 15.5 Hz, 2H), 4.82 (br s, 1H), 4.69 (d, *J* = 15.5 Hz, 1H), 4.46 – 4.27 (m, 8H), 3.59 (br d, *J* = 14 Hz, 1H), 3.49 – 3.45 (m, 2H), 3.11 (br d, *J* = 17 Hz, 1H), 2.35 (s, 3H), 1.38 – 1.33 (m, 12H), 1.26 – 1.19 (m, 3H). <sup>13</sup>C NMR (125.7 MHz, CDCl<sub>3</sub>, ppm) 169.4, 169.1, 168.3, 168.2, 135.1, 133.5, 131.9, 130.8, 130.0, 128.9, 128.5, 121.4(3), 121.4(0), 108.4, 108.1, 62.8, 62.7, 41.8, 35.7, 34.9, 31.5, 22.6, 20.2, 17.6, 14.1, 14.0, 13.9(2), 13.9(1), 13.8. FT-IR (thin film, cm<sup>-1</sup>) 2977, 2934, 1728, 1618,

<sup>4</sup> Ellis, K. K.; Wilke, B.; Zhang, Y.; Diver, S. T. *Org. Lett.* **2000**, 2, 3785-3788.

1489, 1426, 1387, 1242, 1156, 1097, 1027, 858, 753. High resolution MS (EI,  $m/z$ ): anal calcd for  $C_{33}H_{40}N_2S_2O_9$ : 672.2177; found: 673.2248 ( $M+H^+$ ), error: 1.6 ppm.

### [3.3] Benzimidazolophane 3A

Dithiacyclophane **2A** (4.5 g, 7 mmol) was dissolved in 200 mL  $(EtO)_3P$  by heating to 60 °C for about 10 min and was then transferred to an immersion well reactor, equipped with a medium pressure Hg lamp (Hanovia) in a pyrex water-jacketed cold finger. The solution was sparged with argon during UV irradiation. Irradiation was conducted for 2 h at which time, TLC showed full conversion of the starting material. The solvent was removed *in vacuo* in a fume hood and the residue was rinsed with ice cold diethyl ether yielding 1.89 g (46%) of **3A** as a white solid. This was rinsed several times with more diethyl ether and observed to be pure by NMR. Crystals were grown by slow evaporation from  $CH_2Cl_2$  and diethyl ether, mp 141-143 °C.  $^1H$  NMR (500 MHz,  $CDCl_3$ , ppm)  $\delta$  7.23 (s, 2H), 7.01-6.93 (m, 4H), 6.44 (s, 2H), 4.82 (d,  $J$  = 15 Hz, 2H), 4.44-4.31 (m, 8H), 4.13 (d,  $J$  = 15 Hz, 2H), 3.48 (d,  $J$  = 15 Hz, 2H), 3.36 (d,  $J$  = 15 Hz, 2H), 1.39-1.32 (m, 12H).  $^{13}C$  NMR (125.7 MHz,  $CDCl_3$ , ppm)  $\delta$  171.9, 170.3, 152.5, 133.4 (CH), 130.1 (CH), 129.5, 127.6, 120.9 (CH), 108.2 (CH), 62.4 ( $CH_2$ ), 62.2 ( $CH_2$ ), 57.5, 43.1 ( $CH_2$ ), 38.4 ( $CH_2$ ), 13.9 ( $CH_3$ ), 13.8 ( $CH_3$ ). FT-IR (thin film,  $cm^{-1}$ ) 2978, 2359, 1731, 1495, 1440, 1365, 1300, 1236, 1114, 1095, 1081, 860, 772. High resolution MS (EI,  $m/z$ ): anal calcd for  $C_{31}H_{36}N_2O_9$ : 580.2445; found: 580.2420; error: 4.3 ppm. Elemental analysis, calculated: C, 64.1; H, 6.3; N, 4.8%; found, C, 63.9; H, 6.3; N, 4.8%.

Crystals of **3A** were subjected to x-ray analysis. See attached cif file.

### [3.3] Benzimidazolophane 3B

Dithiacyclophane **2B** (50 mg, 0.07 mmol) was dissolved in 5 mL  $(EtO)_3P$  by heating to 60 °C for about 10 min and was then transferred to a quartz photolysis tube with a constant sparge of argon. A medium pressure Hg lamp (Hanovia) in a pyrex water-jacketed cold finger was employed for side-on photolysis. Irradiation was conducted for 3 h, at which time full conversion of starting material was observed (TLC). The solvent was removed *in vacuo* in a fume hood and the residue was rinsed with cold diethyl ether yielding 14 mg (31%) of **3B** as a white solid, mp 130 -131 °C.  $^1H$  NMR (500 MHz,  $CDCl_3$ , ppm) 7.08 – 7.06 (m, 1H), 6.98 – 6.94 (m, 2H), 6.89 (s, 1H), 6.86 – 6.84 (m, 1H), 6.75 (s, 1H), 5.12 (d,  $J$  = 15.5 Hz, 1H), 4.82 (d,  $J$  = 15.5 Hz, 1H), 4.60 – 4.53 (m, 1H), 4.54 – 4.23 (m, 8H), 4.14 – 4.06 (m, 2H), 3.85 (d,  $J$  = 15.5, 1H), 3.61 (d,  $J$  = 16.5, 1H), 3.22 – 3.12 (m, 2H), 2.35 (s, 3H), 1.44 – 1.31 (m, 12H), 1.27 (s, 3H).  $^{13}C$  NMR (125.7 MHz,  $CDCl_3$ , ppm) 172.5, 171.9, 171.2, 170.4, 153.4, 135.5, 132.9, 132.4, 131.1, 130.2, 129.7, 129.4, 120.9, 120.8, 108.6, 108.2, 62.6, 62.4(3), 62.4(0), 62.2, 58.0, 57.8, 43.9, 42.2, 32.9, 32.5, 20.3, 17.7, 14.0(4), 14.0(1), 13.9. FT-IR (thin film,  $cm^{-1}$ ) 2979, 2363, 2341, 1729, 1493, 1446, 1366, 1236, 1091, 1029, 859. High resolution MS (EI,  $m/z$ ): anal calcd for  $C_{33}H_{40}N_2O_9$ : 608.2735; found: 631.2623 ( $M+Na^+$ ); error: 0.5 ppm.

### 3,9-Dithiaimidazolidinophane 7A

A 500 mL rb flask equipped with a magnetic stirbar and rubber septum was charged with 150 mL methanol and 15 drops of H<sub>2</sub>SO<sub>4</sub> and stirred at room temperature under an argon atmosphere. Two gas tight syringes (5 mL) with teflon-tipped plungers were individually loaded with solutions of 348 mg of 1,3-bis(methoxy)-2-imidazolidinone (2 mmol) and 340 mg of 1,3-benzenedimethanethiol (2 mmol) each in methanol (5 mL total volume), which were added over a period of 6 h via syringe pump. After the addition was complete, TLC indicated complete consumption of reactants. The contents were diluted with 100 mL of CHCl<sub>3</sub> and transferred into a 500 mL separatory funnel and washed with NaHCO<sub>3</sub> (2 x 100 mL portions), dried (K<sub>2</sub>CO<sub>3</sub>) and evaporated (rotary evaporator) to give a crude white solid. This was dissolved in a minimum of CHCl<sub>3</sub>, evaporated onto 2 g flash-grade silica gel *in vacuo* (rotary evaporator), then loaded onto a silica gel column (4 cm x 15 cm) and eluted with 20 % ethyl acetate-hexanes to give 377 mg **7A** (67 %) as a white solid. Crystals of **7A** were obtained by slow evaporation from CH<sub>2</sub>Cl<sub>2</sub>, mp 159-161 °C. <sup>1</sup>H NMR (500 MHz, CDCl<sub>3</sub>, ppm) δ 7.34 – 7.30 (m, 1H), 7.23 – 7.22 (m, 2H), 7.15 (s, 1H), 5.44 (d, *J* = 15, 2H), 3.77 (d, *J* = 15 Hz, 2H), 3.75 – 3.66 (m, 4H), 2.80 – 2.78 (m, 2H), 2.67 – 2.64 (m, 2H). <sup>13</sup>C NMR (125.7 MHz, CDCl<sub>3</sub>, ppm) δ 157.5, 139.6, 129.1(CH), 128.0 (CH), 126.9 (CH), 47.9 (CH<sub>2</sub>), 38.4 (CH<sub>2</sub>), 37.1 (CH<sub>2</sub>). COSY analysis showed coupling between protons with δ 7.23 – 7.22 and 3.75 – 3.66; 5.44 and 3.75 – 3.66. FT-IR (thin film, cm<sup>-1</sup>) 1690, 1486, 1439, 1249, 1224, 715. High resolution MS (EI, *m/z*): anal calcd for C<sub>13</sub>H<sub>16</sub>N<sub>2</sub>S<sub>2</sub>O: 280.0701; found: 280.0699, error: 1.0 ppm.

### 3,9-Dithiaimidazolidinophane 7B

A 500 mL rb flask equipped with a magnetic stir bar and rubber septum was charged with 150 mL methanol and 15 drops of H<sub>2</sub>SO<sub>4</sub> and stirred at room temperature under an argon atmosphere. A gas tight syringe (10 mL) with teflon-tipped plunger was loaded with a solution of 348 mg of 1,3-bis(methoxy)-2-imidazolidinone **6** (2 mmol) and 396 mg of 1,3 benzenedimethanethiol **5B** (2 mmol) in methylene chloride (10 mL total volume). This solution was added over a period of 6 h via syringe pump. After the addition was complete, TLC indicated complete consumption of reactants. The contents were diluted with 100 mL of CHCl<sub>3</sub> and transferred to a 500 mL separatory funnel and washed with NaHCO<sub>3</sub> (2 x 100 mL portions), dried (K<sub>2</sub>CO<sub>3</sub>), and concentrated (rotary evaporator) to give a crude white solid. This was dissolved in a minimum of CHCl<sub>3</sub>, evaporated onto 2 g flash-grade silica gel *in vacuo* (rotary evaporator), then loaded onto a silica gel column (4 cm x 15 cm) and eluted with 20 % ethyl acetate-hexanes to give 290 mg **7B** (47%) as a white solid. Crystals of **7B** were obtained by slow evaporation from CH<sub>2</sub>Cl<sub>2</sub>, mp 234 – 236 °C. <sup>1</sup>H NMR (500 MHz, CDCl<sub>3</sub>, ppm) δ 7.26 (s, 1H), 7.03 (s, 1H), 6.94 (s, 1H), 5.51 (d, *J* = 12 Hz, 2H), 3.82 – 3.75 (m, 4H), 3.66 (d, *J* = 14.5 Hz, 2H), 2.82 – 2.69 (m, 4H), 2.31 (s, 6H). <sup>13</sup>C NMR (125.7 MHz, CDCl<sub>3</sub>, ppm) δ 157.8, 134.9, 134.3, 132.5 (CH), 129.2 (CH), 48.0 (CH<sub>2</sub>), 38.4 (CH<sub>2</sub>), 35.8 (CH<sub>2</sub>), 18.6 (CH<sub>3</sub>). COSY analysis indicates coupling between signals at δ 7.03 and 3.82 – 3.75; 7.03 and 2.31; 6.94 and 3.66; 6.94 and 2.31; 5.51 and 3.82 – 3.75; 5.51 and 3.66; 3.82 – 3.75 and 2.31. FT-IR

(thin film,  $\text{cm}^{-1}$ ) 1686, 1488, 1435, 1247, 1227, 906. High resolution MS (EI,  $m/z$ ): anal calcd for  $\text{C}_{15}\text{H}_{20}\text{N}_2\text{S}_2\text{O}$ : 308.1007; found: 308.1012, error: 1.4 ppm.

### 3,9-Dithia-benzimidazolophane 8A

Into an argon-flushed 50 mL rb flask equipped with magnetic stirbar and rubber septum was placed 44 mg 1,3-bis(methoxymethyl)-2-benzimidazolidinone (0.2 mmol), 34 mg 1,4-benzenedimethanethiol (0.2 mmol) in 10 mL  $\text{CH}_2\text{Cl}_2$  at room temperature to which 0.1 mL  $\text{BF}_3\text{-OEt}_2$  (0.113 g, 0.8 mmol) was added dropwise via syringe. The reactants were stirred for 4 h at room temperature at which time the reaction was complete (TLC). The reaction contents were poured into a separatory funnel containing 50 mL  $\text{NaHCO}_3$ , partitioned, and the aqueous layer was extracted three times with 20 mL portions of  $\text{CH}_2\text{Cl}_2$ . The pooled organics were dried ( $\text{K}_2\text{CO}_3$ ) and concentrated to give 84 mg of a white foam which was purified by flash chromatography (1 cm x 12 cm) 1:4 ethyl acetates-hexanes (100 mL) then gradient elution to 1:1 ethyl acetate-hexanes) to afford 53 mg **8A** as a white solid (83 %). Crystallization from  $\text{CH}_2\text{Cl}_2$  gave white crystals, mp 173 – 174 °C. Analytical TLC: (1:3 ethyl acetate-hexanes)  $R_f$  0.45.  $^1\text{H}$  NMR (300 MHz,  $\text{CDCl}_3$ , ppm)  $\delta$  7.08 (s, 1H), 6.86 (s, 4H), 6.72 (br d,  $J$  = 7.8 Hz, 2H), 6.60 – 6.54 (m, 1H), 5.75 (d,  $J$  = 14.4 Hz, 2H), 4.40 (d,  $J$  = 14.4 Hz, 2H), 3.77 – 3.62 (m, 4H).  $^{13}\text{C}$  NMR (75 MHz,  $\text{CDCl}_3$ , ppm)  $\delta$  153.6, 137.8, 128.0, 127.0, 126.7, 121.0, 109.8, 44.4, 37.2. FT-IR (thin film,  $\text{cm}^{-1}$ ) 3060, 2916, 1703, 1611, 1492, 1422, 1393, 1291, 1159, 1034, 890. High resolution MS (EI,  $m/z$ ): anal calcd for  $\text{C}_{17}\text{H}_{16}\text{N}_2\text{S}_2\text{O}$ : 328.0699; found: 328.0699; error: 0 ppm.

### 3,9-Dithia-benzimidazolophane 8B

Into an argon-flushed 50 mL rb flask equipped with magnetic stirbar and rubber septum was placed 44 mg (0.2 mmol) 1,3-bis(methoxymethyl)-2-benzimidazolidinone, 34 mg (0.2 mmol) 1,3 – bismercaptomethyl – 4, 6-dimethylbenzene<sup>5</sup> in 10 mL  $\text{CH}_2\text{Cl}_2$  at room temperature to which 0.1 mL  $\text{BF}_3\text{OEt}_2$  (0.113 g, 0.8 mmol) was added dropwise via syringe. The reactants were stirred for 4 h at room temperature at which time the reaction was complete (TLC). The reaction contents were poured into a separatory funnel containing 50 mL  $\text{NaHCO}_3$ , partitioned, and the aqueous layer was extracted three times with 20 mL portions of  $\text{CH}_2\text{Cl}_2$ . The pooled organics were dried ( $\text{K}_2\text{CO}_3$ ) and concentrated to give a white foam which was purified by flash chromatography (1 cm x 12 cm, 1:4 ethyl acetate-hexanes (100 mL) then gradient elution to 1:1 ethyl acetate-hexanes) to afford 20 mg **8B** as a white solid (29 %). Crystallization from  $\text{CH}_2\text{Cl}_2$  gave white crystals, mp 206 – 208 °C. Analytical TLC: (1:3 ethyl acetate-hexanes)  $R_f$  0.45.  $^1\text{H}$  NMR (500 MHz,  $\text{CDCl}_3$ , ppm)  $\delta$  7.00 – 6.97 (m, 3H), 6.90 – 6.88 (m, 2H), 6.33 (s, 1H), 5.91 (d,  $J$  = 14.5 Hz, 2H), 4.49 (d,  $J$  = 14.5 Hz, 2H), 3.80 (d,  $J$  = 15 Hz, 2H), 3.72 (d,  $J$  = 15 Hz, 2H), 2.06 (s, 6H).  $^{13}\text{C}$  NMR (75 MHz,  $\text{CDCl}_3$ , ppm)  $\delta$  153.7, 134.7, 132.6 (CH), 131.6, 128.0 (CH), 127.1, 120.8 (CH), 109.9, 44.3 ( $\text{CH}_2$ ), 36.0 ( $\text{CH}_2$ ), 18.3 ( $\text{CH}_3$ ). FT-IR (thin film,  $\text{cm}^{-1}$ ) 1701, 1559, 1492, 1425, 1394, 1286, 1034. High resolution MS (EI,

<sup>5</sup> Gerisch, M.; Krumper, J. R.; Bergman, R. G.; Tilley, T. D. *Organometallics* **2003**, 22, 47-58.

m/z): anal calcd for C<sub>19</sub>H<sub>20</sub>N<sub>2</sub>S<sub>2</sub>O: 356.10126; found: 356.1012; error: 0.3 ppm.

## [2.2] Benzimidazolophane 9A

Into an immersion well reactor was dissolved 1.3g crude **8A** in 200 mL of 2:3 v/v benzene-P(OEt)<sub>3</sub> which was equipped with a medium pressure Hg lamp (Hanovia) contained in a pyrex water-jacketed cold finger. The solution was continuously sparged with a stream of argon and was irradiated for 5 h. The solvents were removed *in vacuo* (high vacuum) and the crude was purified by flash chromatography (2.5 cm x 12 cm, 1:4 ethyl acetate-hexanes) affording 250 mg (25%) of **9A**. Crystals of **9A** were obtained by slow evaporation of CH<sub>2</sub>Cl<sub>2</sub>, mp 148 – 149 °C. <sup>1</sup>H NMR (300 MHz, CDCl<sub>3</sub>, ppm) δ 7.33 – 7.10 (m, 7H), 5.20 (s, 1H), 4.04 – 3.85 (m, 4H), 2.85 – 2.66 (m, 4H). <sup>13</sup>C NMR (75.5 MHz, CDCl<sub>3</sub>, ppm) δ 158.2, 138.5, 131.7, 131.4, 129.9, 126.6, 121.8, 109.9, 45.7, 33.8. FT-IR (thin film, cm<sup>-1</sup>) 2942, 2360, 1718, 1486, 1439, 1372, 1345, 1298, 1142, 1013, 786, 749, 719. High resolution MS (E/I, m/z): anal calcd for C<sub>17</sub>H<sub>16</sub>N<sub>2</sub>O: 264.1257; found: 264.1261; error: 1.6 ppm.

Crystals of **9A** were subjected to x-ray analysis. See attached cif file.

## [2.2] Benzimidazolophane 9B

Into an immersion well reactor was dissolved 1.5 g **8B** in 250 mL of 2:3 v/v benzene-P(OEt)<sub>3</sub> which was equipped with a medium pressure Hg lamp (Hanovia) contained in a pyrex water-jacketed cold finger. The solution was continuously sparged with a stream of argon and was irradiated for 3 h. The volatiles were removed *in vacuo* (high vacuum) and the crude product was purified by flash chromatography (2.5 cm x 12 cm, 1:4 ethyl acetate-hexanes) affording 134 mg (11%) of **9B**. Crystals of **9B** were obtained by slow evaporation of CH<sub>2</sub>Cl<sub>2</sub>, mp 177 – 179 °C. <sup>1</sup>H NMR (500 MHz, CDCl<sub>3</sub>, ppm) δ 7.17 – 7.14 (m, 2H), 7.11 – 7.09 (m, 2H), 6.96 (s, 1H), 5.00 (s, 1H), 3.96 – 3.93 (m, 2H), 3.87 – 3.81 (m, 2H), 2.86 (d, *J* = 13.5 Hz, 2H), 2.58 – 2.52 (m, 2H), 2.306 (s, 6H). <sup>13</sup>C NMR (75.5MHz, CDCl<sub>3</sub>, ppm) δ 158.3, 134.2, 134.0, 132.4 (CH), 132.2 (CH), 131.5, 121.6 (CH), 109.9 (CH), 44.4 (CH<sub>2</sub>), 30.2 (CH<sub>2</sub>), 18.4 (CH<sub>3</sub>). FT-IR (thin film, cm<sup>-1</sup>) 2940, 2868, 1719, 1487, 1446, 1374, 1341, 1152, 1013, 748. High resolution MS (E/I, m/z): anal calcd for C<sub>19</sub>H<sub>20</sub>N<sub>2</sub>O: 292.1570; found: 292.1575; error: 1.7 ppm.

STANDARD PROTON PARAMETERS

Pulse Sequence: szpul  
Solvent: CDCl<sub>3</sub>  
Ambient temperature  
File: c11iscyclophane  
INOVA-500 "nmrdata1.chem.buffalo.edu"

Relax. delay 2.000 sec  
Pulse 34.6 degrees  
Acq. time 1.891 sec  
Width 10000.0 Hz  
16 repetitions  
OBSERVE H1, 499.8984013 MHz  
DATA PROCESSING  
Line broadening 0.7 Hz  
FT size 65536  
Total time 1 min, 18 sec

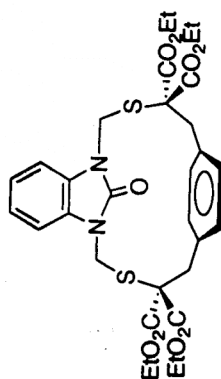

2A

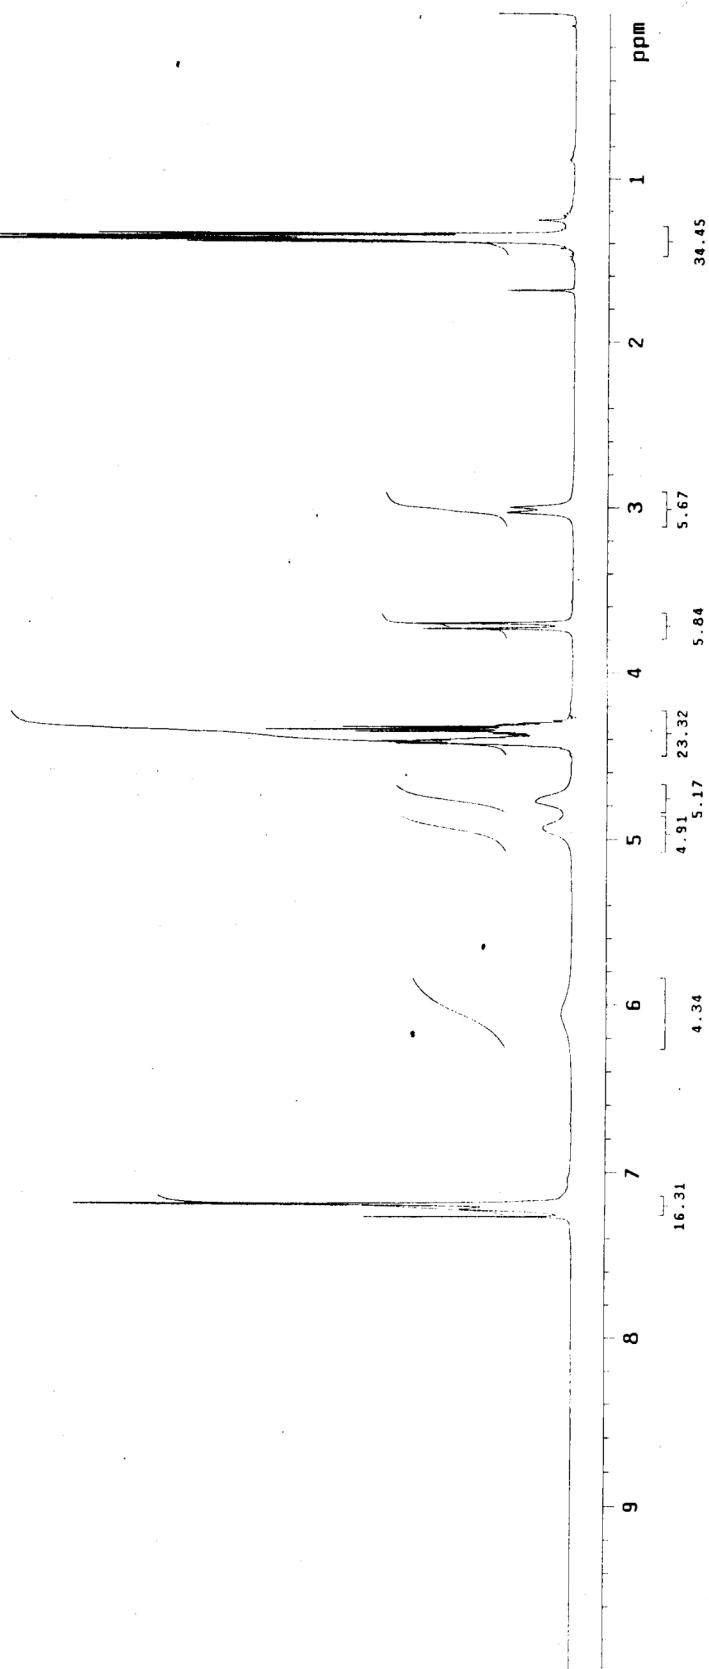



7/4/02

KKE1180revC13ag

Pulse Sequence: s2pul1

Solvent: CDCl3

Ambient temperature

User: 1-14-87

File: KKE1211C13

INDVA-500 "nmrdata.chem.buffalo.edu"

PULSE SEQUENCE

Relax. delay 6.000 sec

Pulse 81.8 degrees

Acq. time 1.300 sec

Width 37037.0 Hz

3017 repetitions

OBSERVE C13, 125.6995440 MHz

DECOUPLE H1, 499.9008902 MHz

Power 40 dB

continuously on

WALTZ-16 modulated

DATA PROCESSING

Line broadening 0.5 Hz

FT size 131072

Total time 203 hr, 2 min, 32 sec

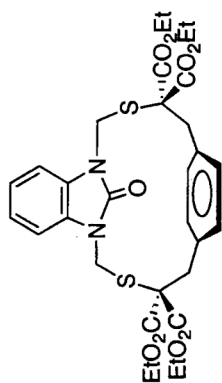

2A

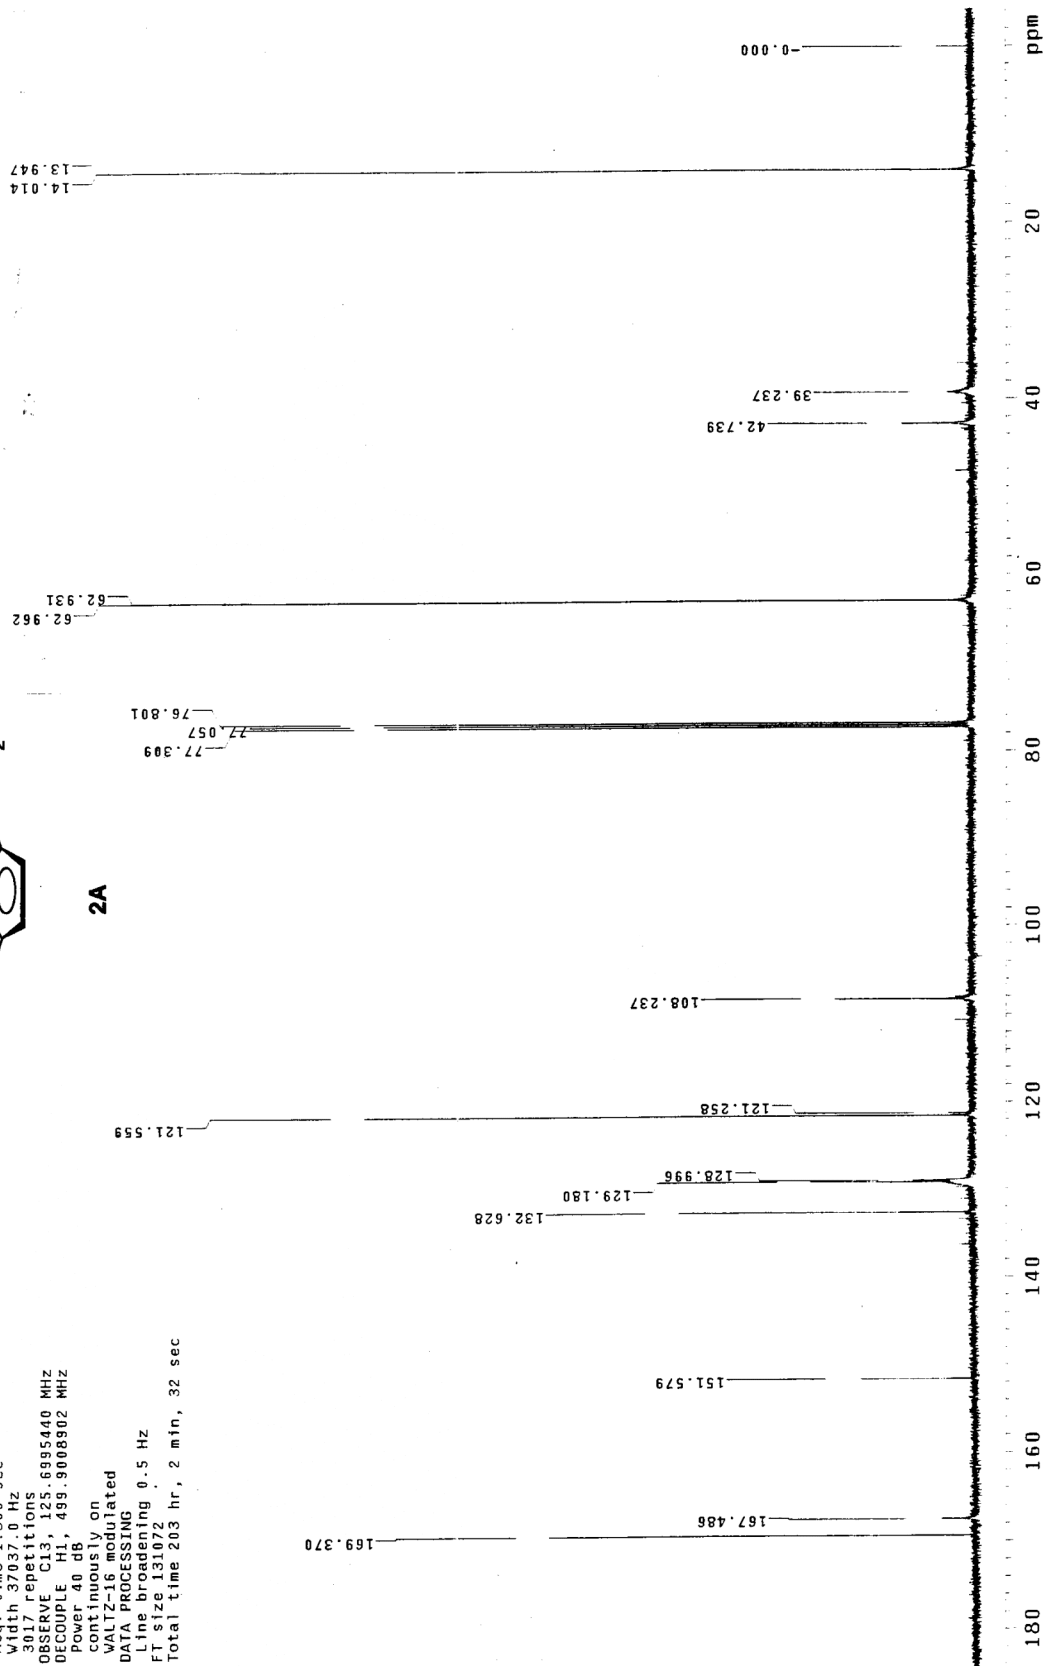

STANDARD CARBON PARAMETER:

Pulse Sequence: s2pul  
Solvent: CDCl<sub>3</sub>  
Ambient temperature  
File: KKE2065  
INOVA-500 "nmrdata.chem.buffalo.edu"

Relax. delay 2.000 sec  
Pulse 34.6 degrees  
Acq. time 1.891 sec  
Width 10000.0 Hz  
64 repetitions  
OBSERVE H1, 499.8983973 MHz  
DATA PROCESSING  
Line broadening 0.5 Hz  
FT size 65536  
Total time 4 min, 25 sec

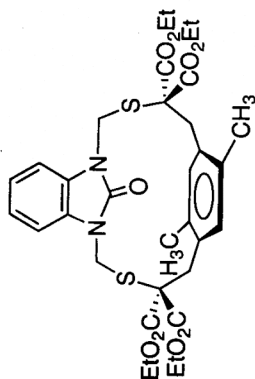

2B

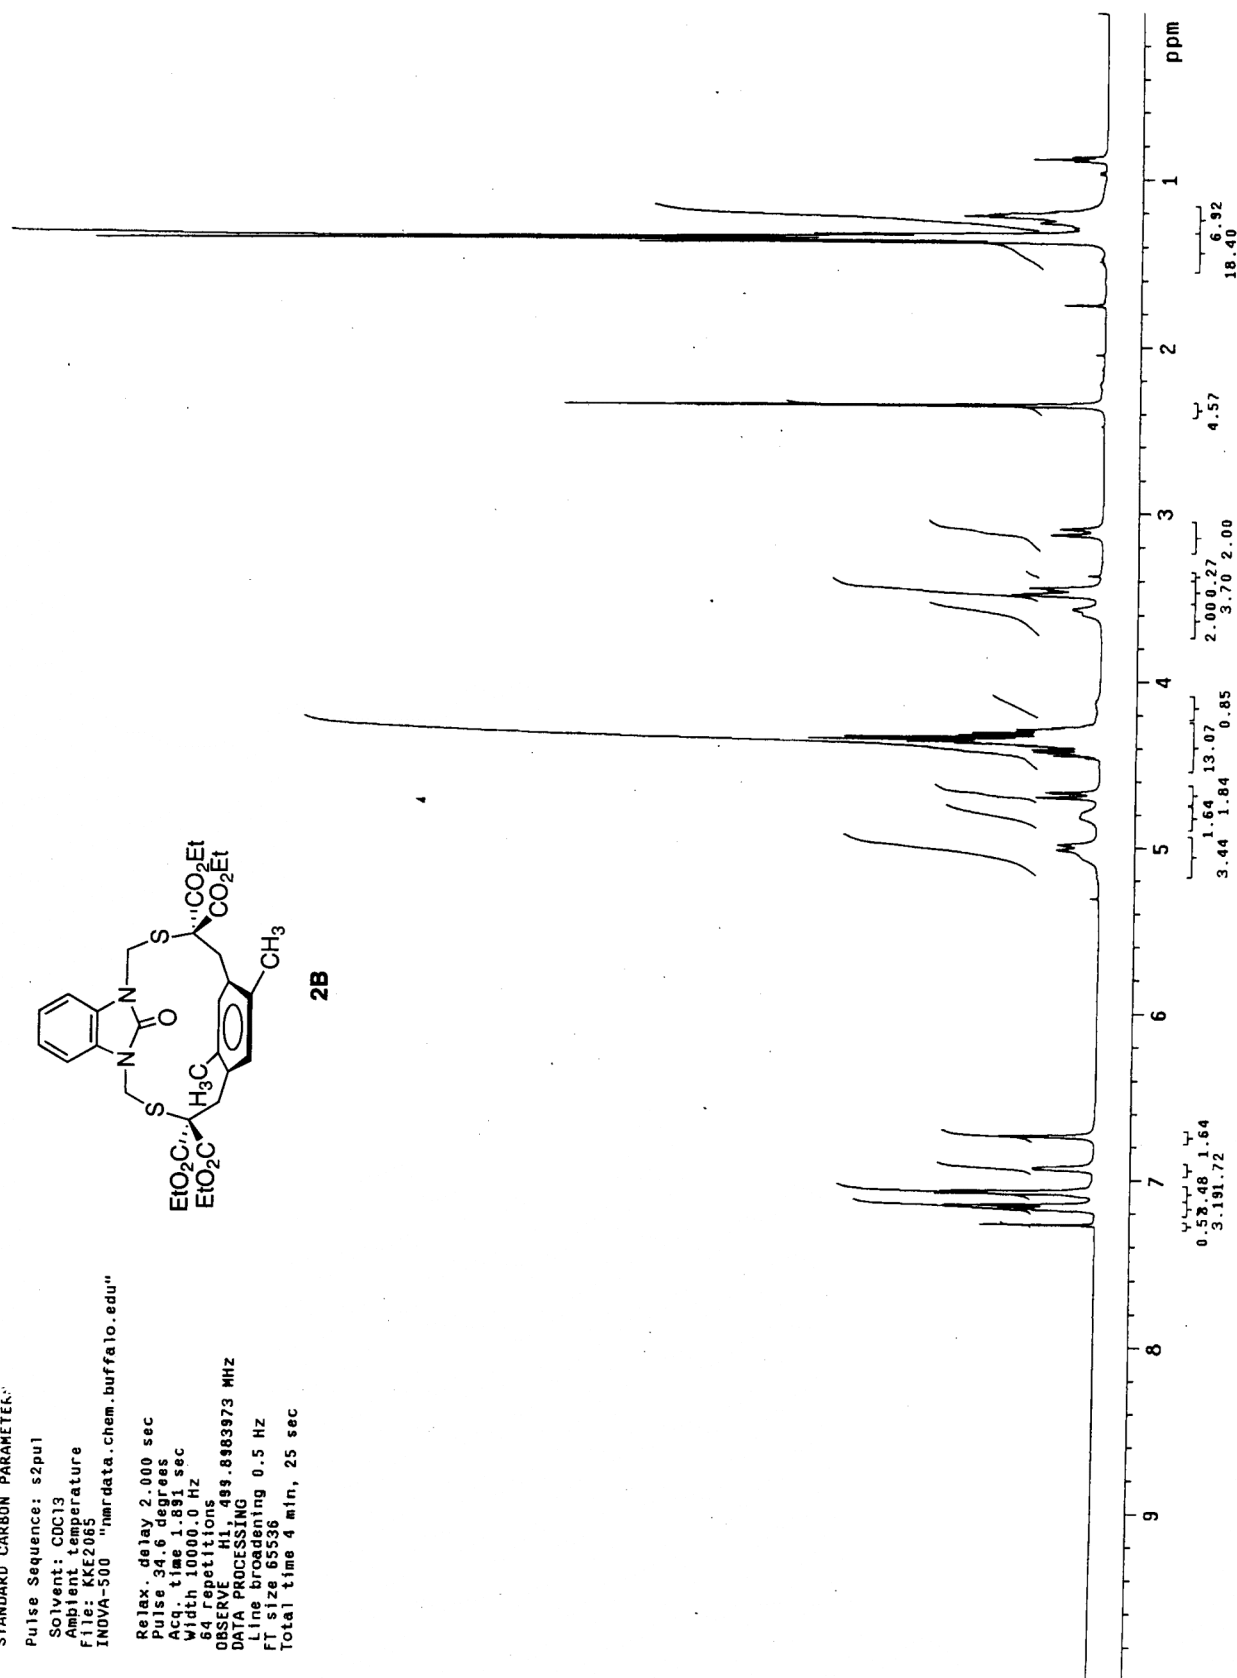

KKE2055C13

Pulse Sequence: s2pul  
Solvent: CDCl<sub>3</sub>  
Ambient temperature  
User: 1-14-87  
INOVA-500 "tocsy.chem.buffalo.edu"

Relax. delay 6.000 sec  
Pulse 61.6 degrees  
Acq. time 1.300 sec  
Width 37037.0 Hz  
552 repetitions  
OBSERVE C13, 125.695575 MHz  
DECOUPLE H1, 499.9008902 MHz  
Power 48 dB  
continuously on  
VOLTAGE-16 modulated  
DATA PROCESSING  
Line broadening 0.5 Hz  
FT size 131072  
Total time 16 hr, 15 min, 3 sec

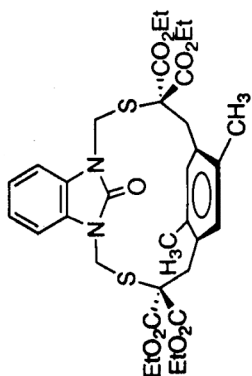

2B

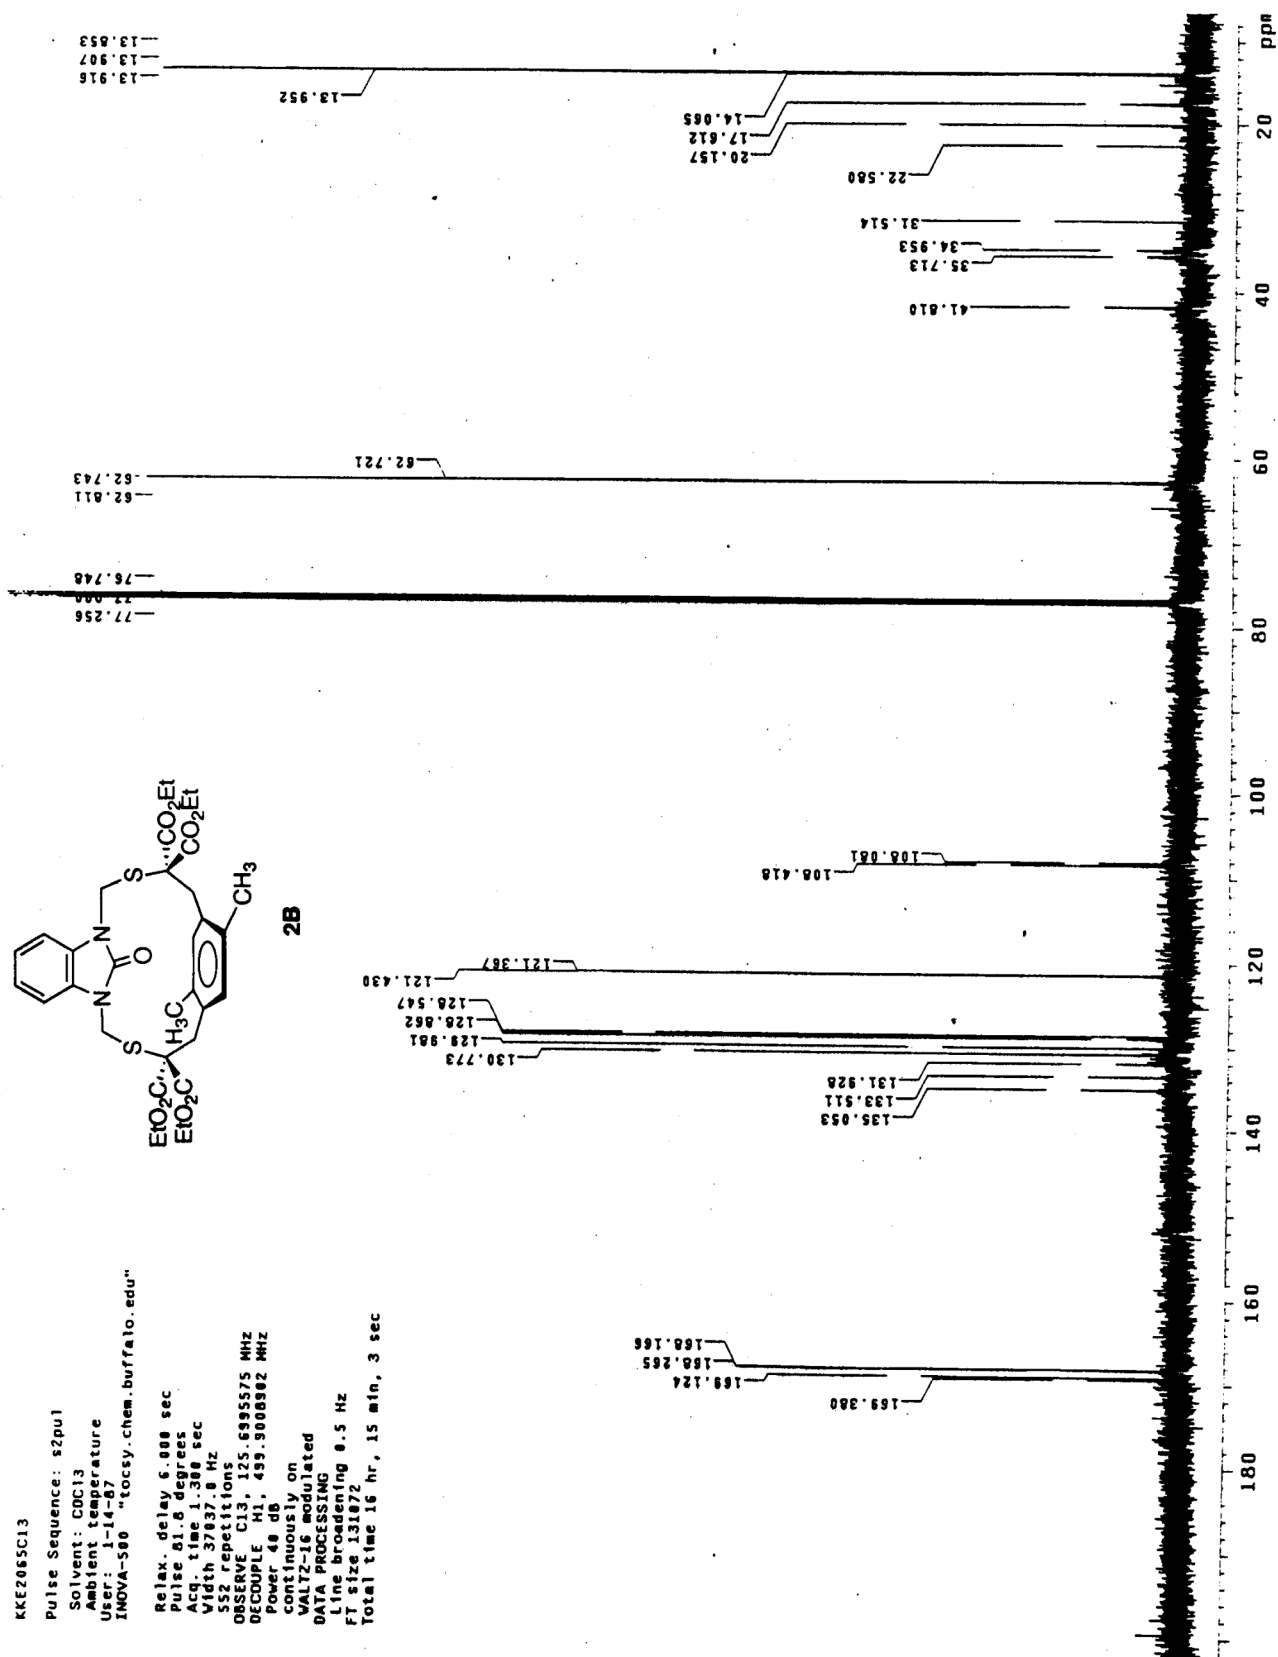

KKE3.3ins

Pulse Sequence: s2pu1

Solvent: CDCl3

Ambient temperature

INOVA-500 "tocsy.chem.buffalo.edu"

Relax. delay 2.000 sec

Pulse 34.6 degrees

Acq. time 1.891 sec

Width 10000.0 Hz

40 repetitions

OBSERVE H1, 499.8984008 MHz

DATA PROCESSING

Line broadening 0.7 Hz

FT size 65536

Total time 2 min, 51 sec

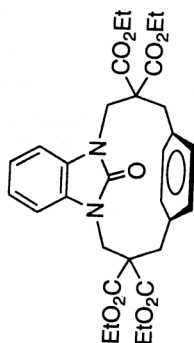

3A

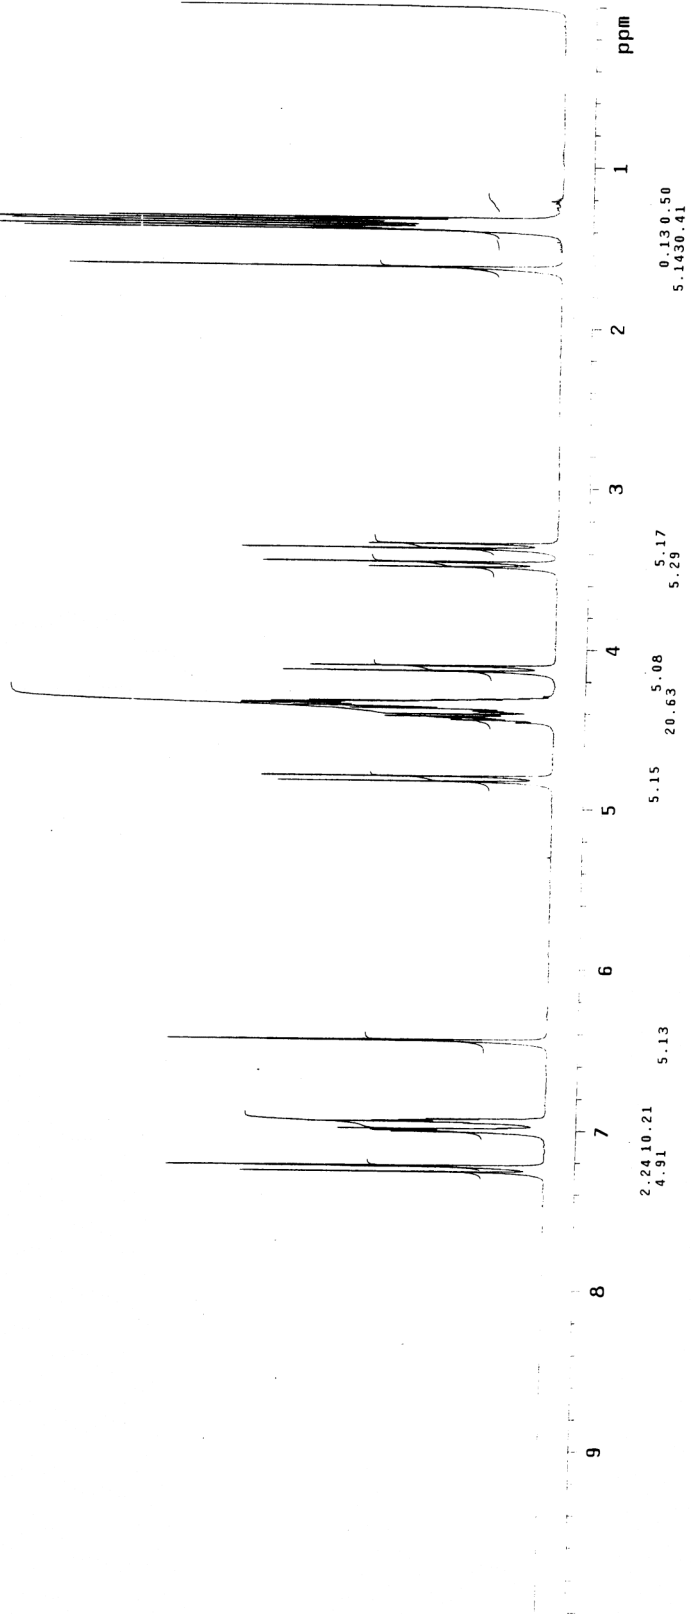

KKE1200

Pulse Sequence: s2pu1

Solvent: CDCl3

Sample temperature

INNOVA-500 "tocsy.chem.buffalo.edu"

Relax. delay 6.000 sec

Pulse 117.4 degrees

Acq. time 1.300 sec

Width 37037.0 Hz

848 repetitions

OBSERVE C13, 125.695557 MHz

DECOUPLE H1, 499.9008902 MHz

Power 43 dB

Continuously on

Variable Z16 modulated

DATA PROCESSING

File 131672

FT size 131672

Total time 162 hr, 26 min, 7 sec

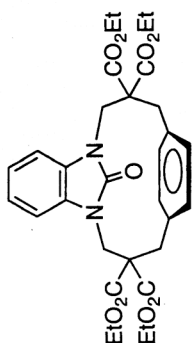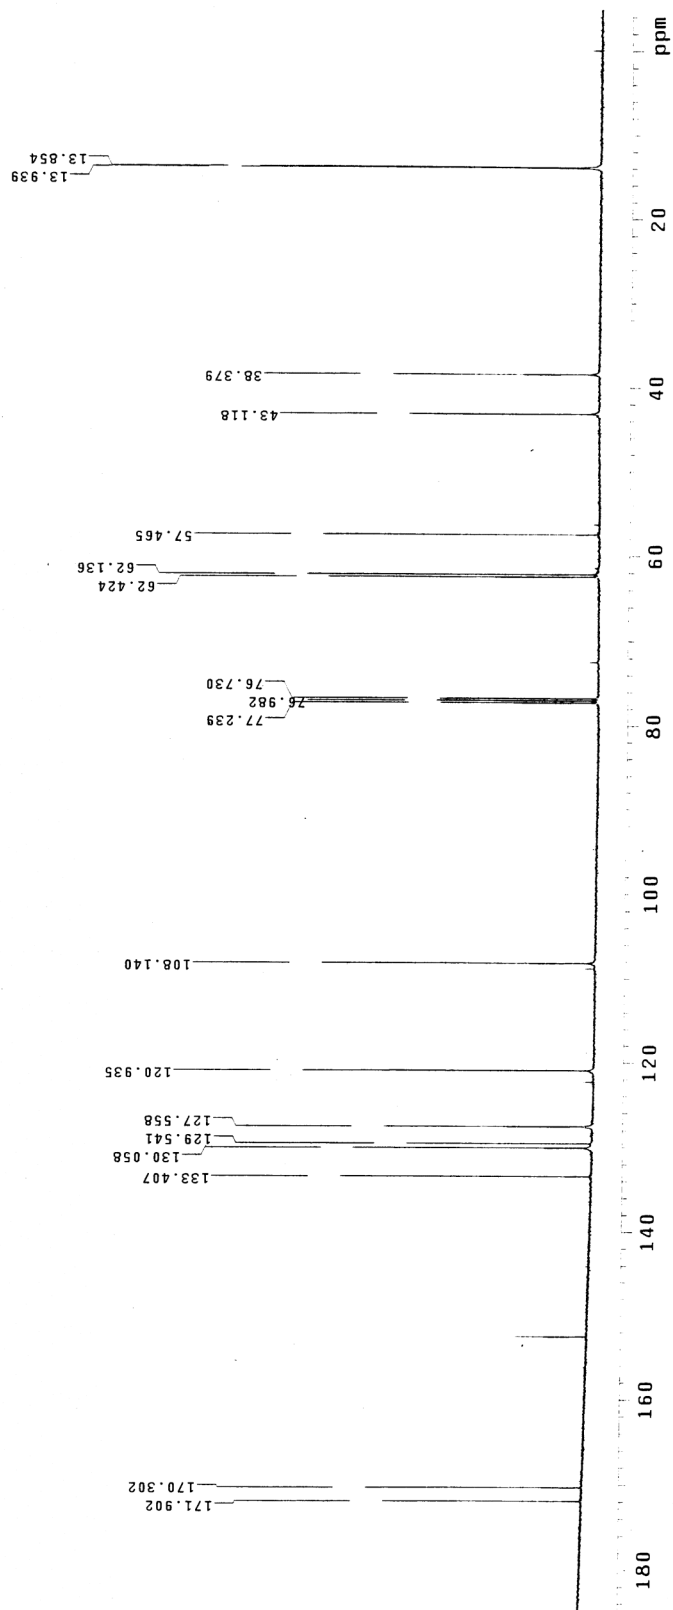

KKE202

Pulse Sequence: s2pul  
Solvent: CDCl<sub>3</sub>  
Ambient temperature  
INOVA-500 "tocsy.chem.buffalo.edu"

Relax. delay 2.000 sec  
Pulse 34.6 degrees  
Acq. time 1.891 sec  
S/N 10000.0 Hz  
64 acquisitions  
OBSERVED 499.8984009 MHz  
DATA PROCESSING 0.7 Hz  
Line broadening 0.7 Hz  
FT size 65536  
Total time 4 min, 25 sec

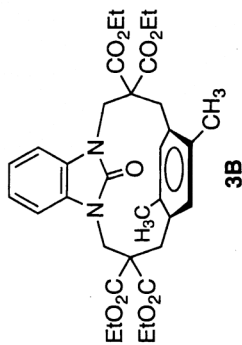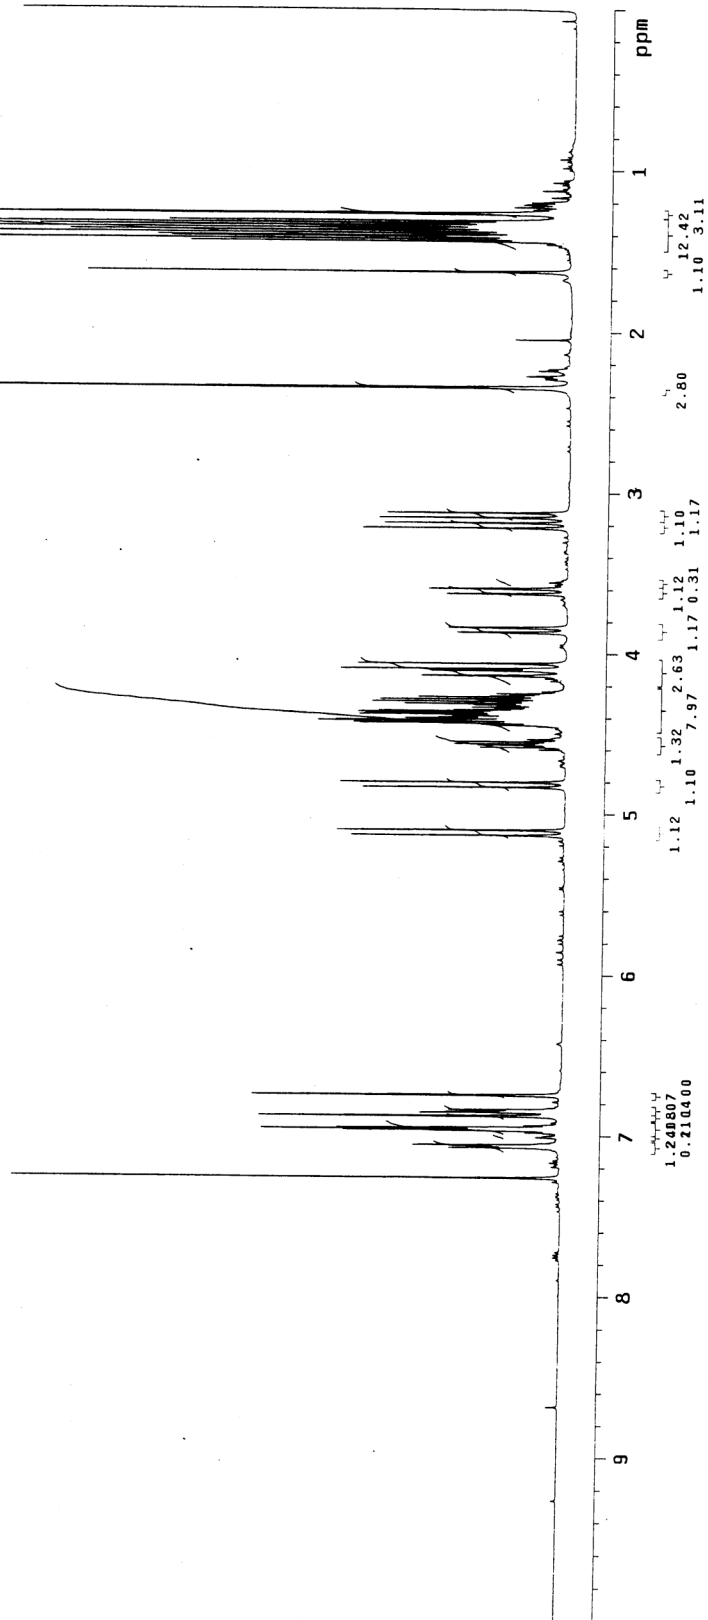

2072c13wodec1ss

Pulse Sequence: s2pu1

Solvent: CDCl3

Ambient temperature

User: i-14-87

INOVA-500 "tocsy.chem.buffalo.edu"

Relax. delay 6.000 sec

Pulse 61.8 degrees

Acq. time 1.300 sec

Width 37037.0 Hz

1880 repetitions

OBSERVE C13, 125.6995518 MHz

DECOUPLE H1, 499.9008902 MHz

Power 40 dB

Continuously on

Variable Modulated

DATA PROCESSING

Line broadening 0.5 Hz

FT size 131072

Total time 162 hr, 26 min, 7 sec

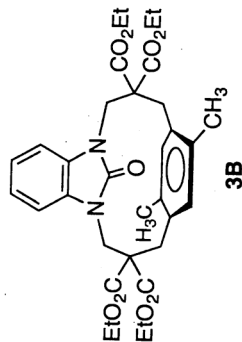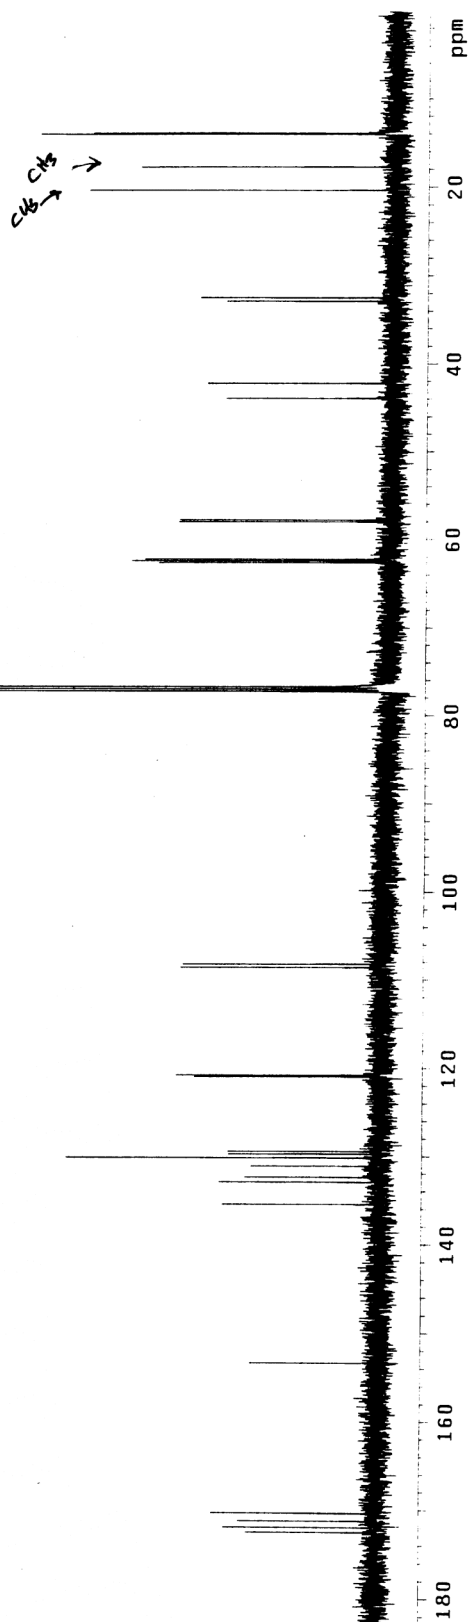

KKE2295

Pulse Sequence: s2pu1  
Solvent: CDCl3  
Ambient temperature  
INOVA-500 "tocsy.chem.buffalo.edu"

Relax. delay 2.000 sec  
Pulse 34.6 degrees  
Acq. time 1.000 sec  
Width 10000.0 Hz  
64 repetitions  
OBSERVE H1  
DATA PROCESSING 499.8983866 MHz  
Line broadening 0.7 Hz  
FT size 65536  
Total time 4 min, 25 sec

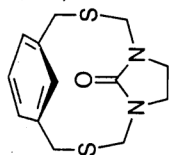

7A

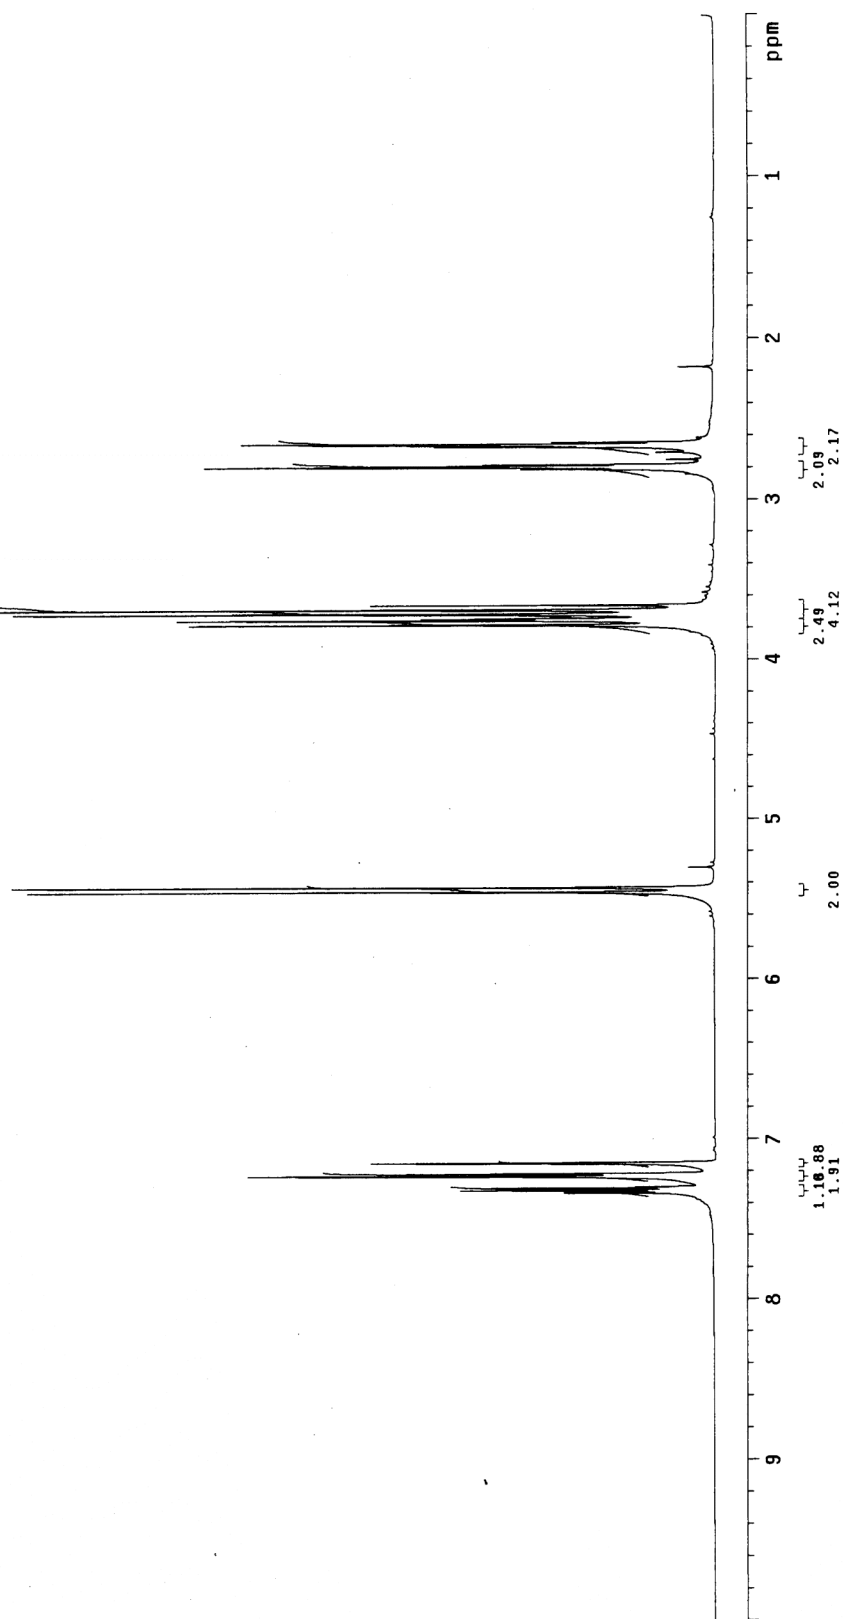



KKE2295C13

Pulse Sequence: s2pul

Solvent: CDCl<sub>3</sub>

Ambient temperature

User: i-14-87

INOVA-500 "tocsy.chem.buffalo.edu"

Relax. delay 6.000 sec

Pulse 61.8 degrees

Acq. time 1.300 sec

Width 37037.0 Hz

Repetitions

OBSERVE C13, 165.6985719 MHz

DECOUPLE H1, 499.9005902 MHz

continuously on

WALTZ-16 modulated

DATA PROCESSING

Line broadening 0.5 Hz

FT size 131072

Total time 1 hr, 2 min, 51 sec

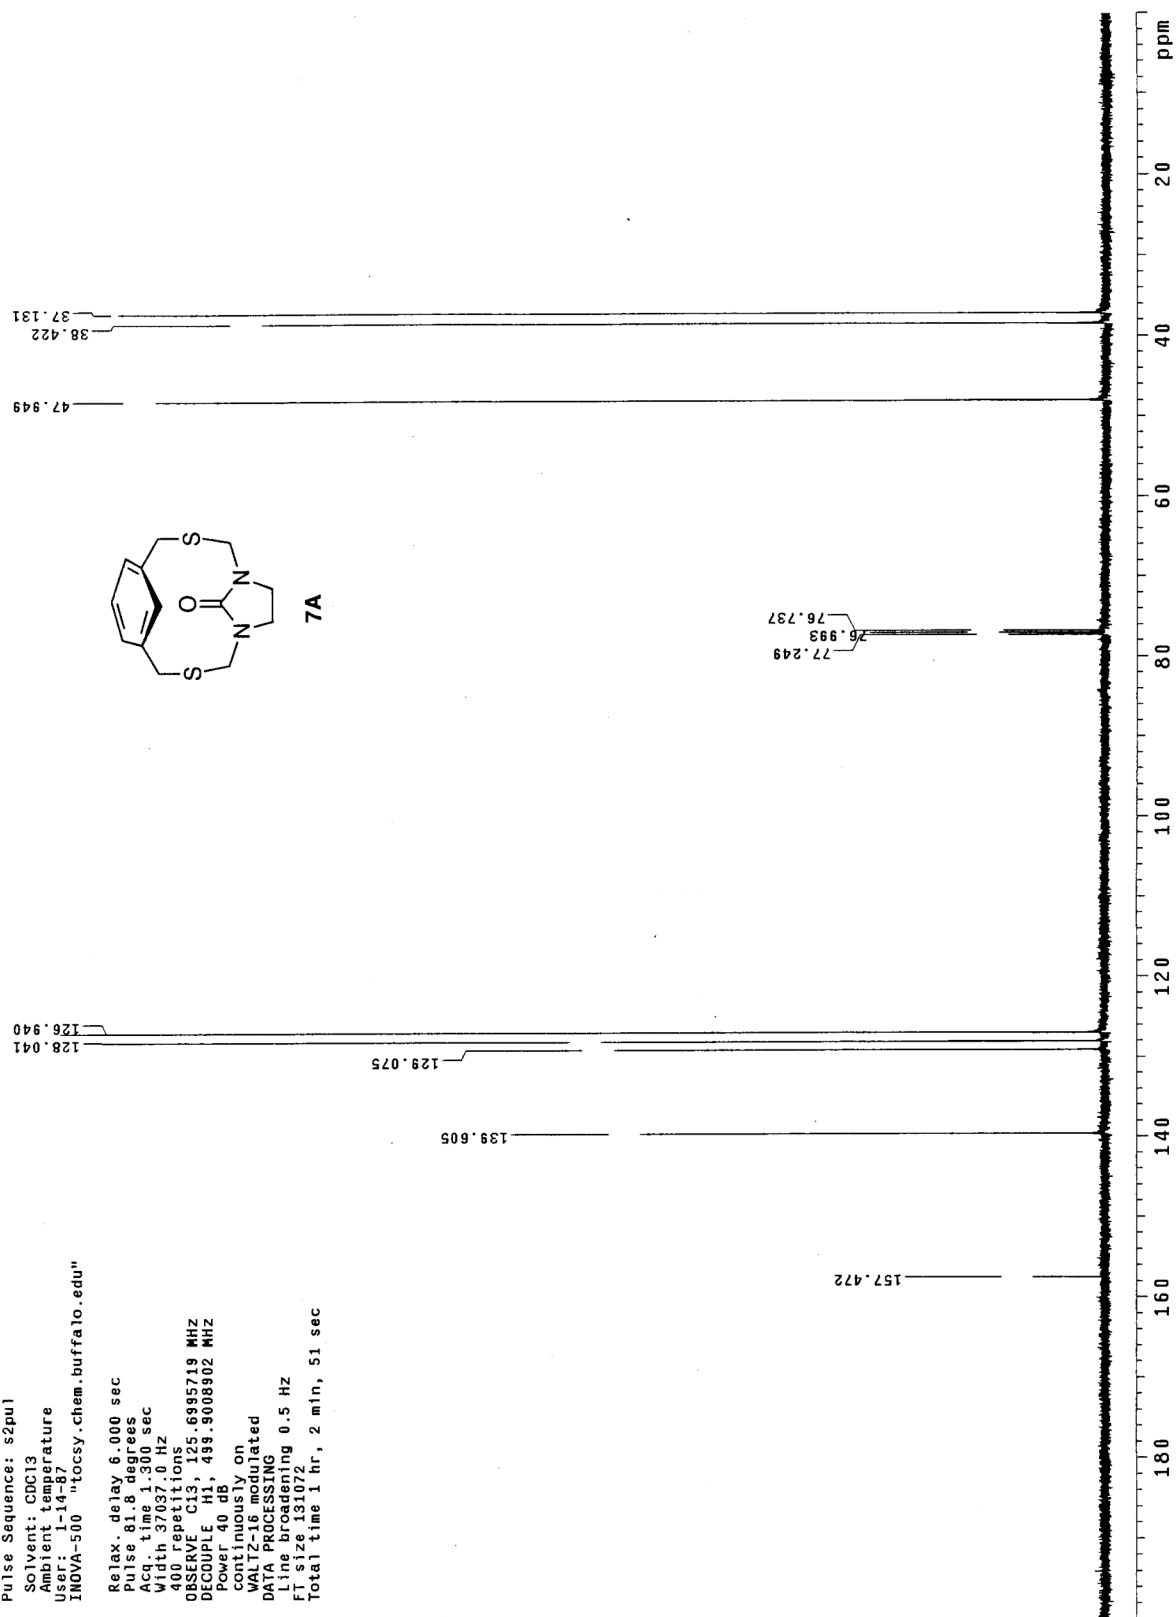

KKE3032

Pulse Sequence: s2pul  
Solvent: CDCl3  
Ambient temperature  
INNOVA-400 "cosy.chem.buffalo.edu"  
PULSE SEQUENCE  
Relax. delay 2.000 sec  
Pulse 29.1 degrees  
Acq. time 1.499 sec  
Width 12001.2 Hz  
64 repetitions  
OBSERVE H1, 399.3389037 MHz  
DATA PROCESSING  
Line broadening 0.7 Hz  
FT size 65536  
Total time 3 min, 58 sec

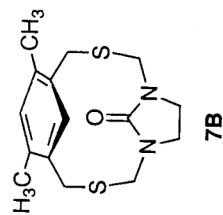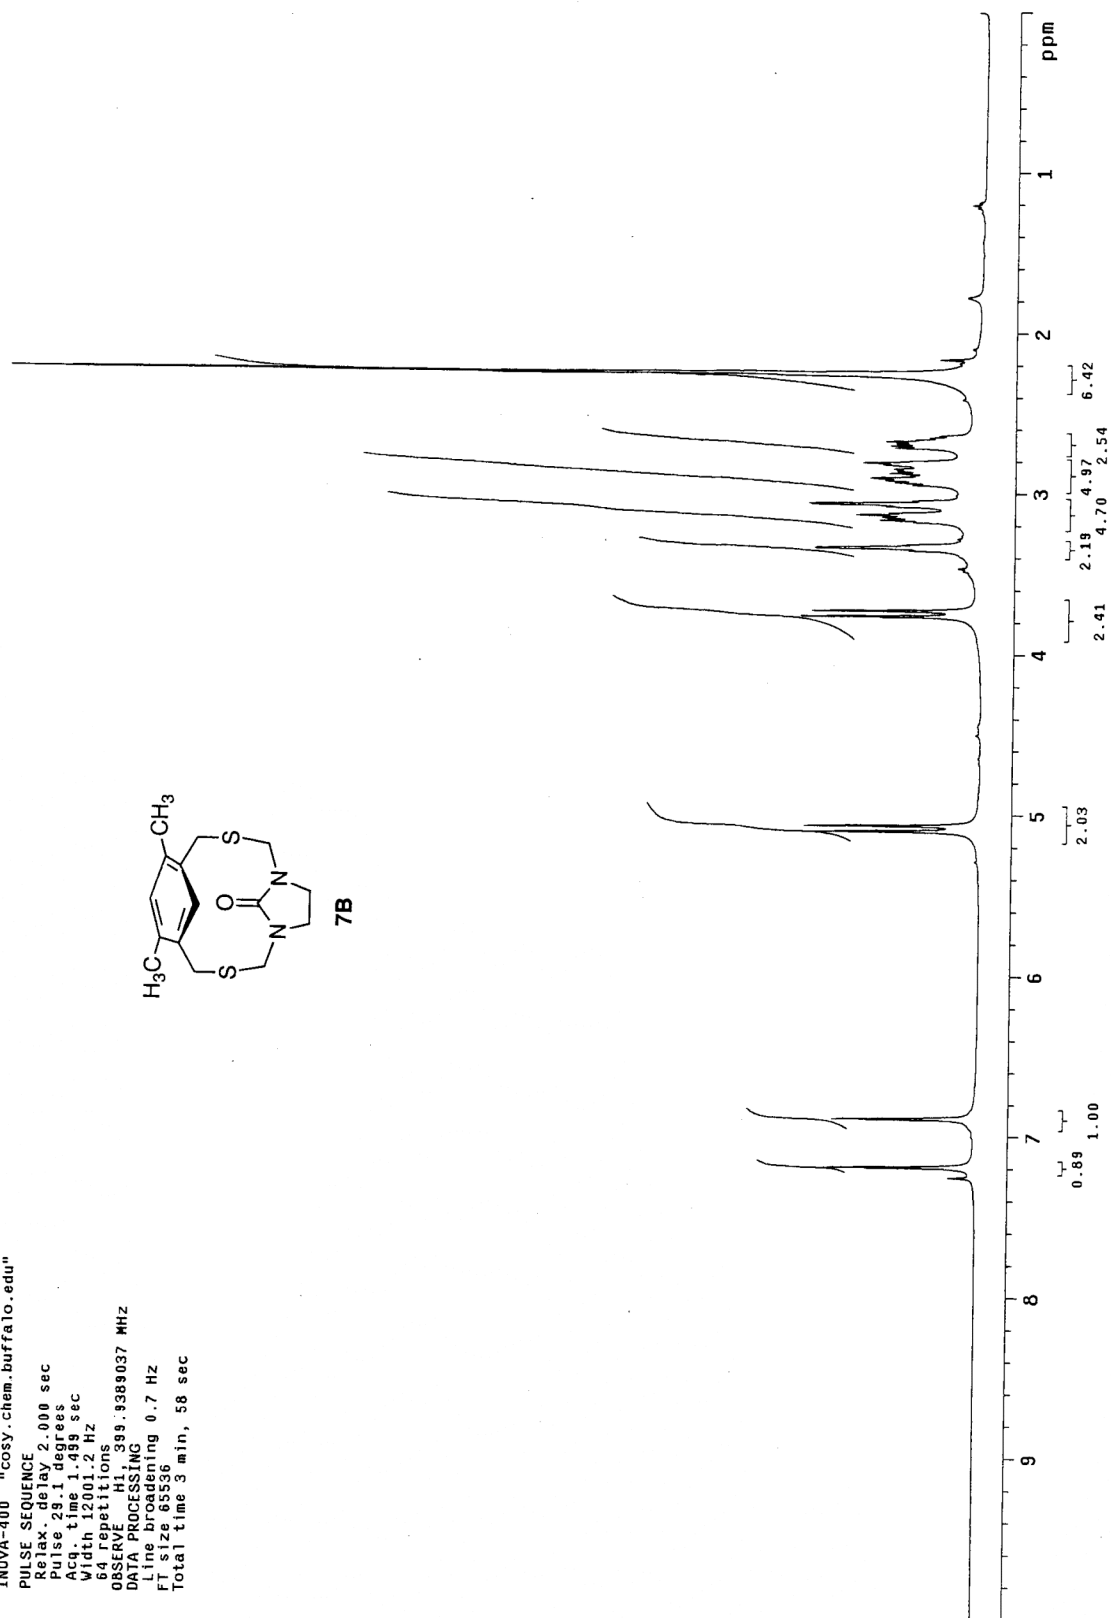

KKE3032C13

Pulse Sequence: s2pul  
Solvent: CDCl3  
Ambient temperature  
GEMINI-300 "roesy.chem.buffalo.edu"

Relax. delay 5.000 sec  
Pulse 90.0 degrees  
Acq. time 1.706 sec  
Width 18761.7 Hz  
5648 repetitions  
OBSERVE C13, 75.4536607 MHz  
DECOUPLE H1, 300.0754431 MHz  
Power 1023 dB  
continuously on  
WALTZ-16 modulated  
DATA PROCESSING  
Line broadening 1.0 Hz  
FT size 65536  
Total time 155 hr, 16 min, 13 sec

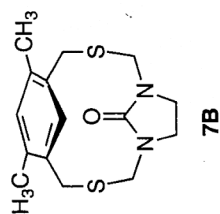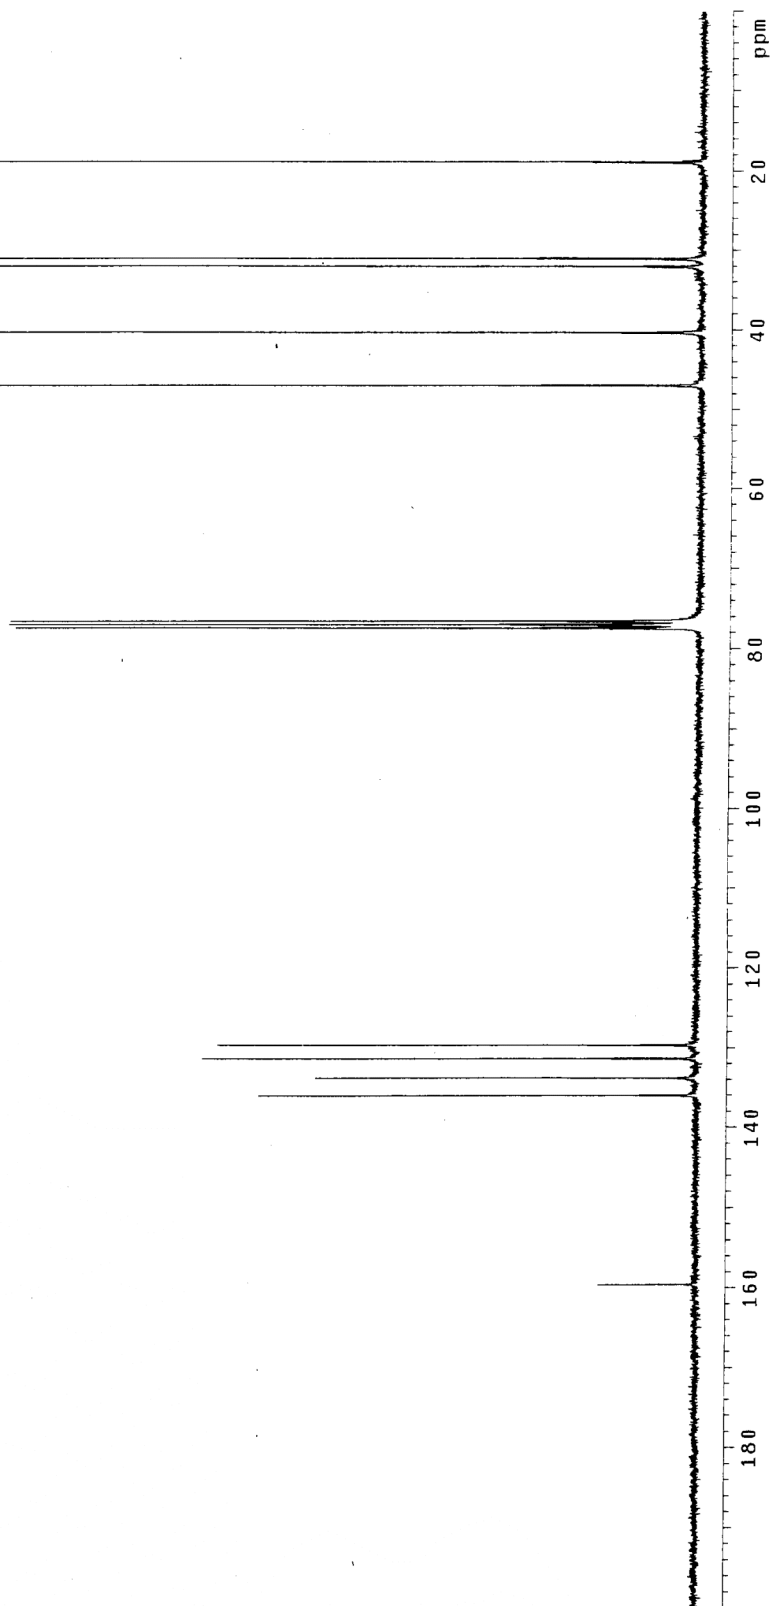

KKE2275

Pulse Sequence: s2pul

Solvent: CDCl<sub>3</sub>

Ambient temperature

File: KKE2275

INOVA-500 "nmrdata.chem.buffalo.edu"

Relax. delay 2.000 sec

Pulse 31.5 degrees

Acq. time 1.998 sec

Wdth 430.5 Hz

64 repetitions

OBSERVED H1 300.0739628 MHz

DATA PROCESSING

Line broadening 1.0 Hz

FT size 32768

Total time 4 min, 32 sec

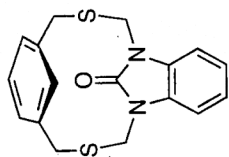

8A

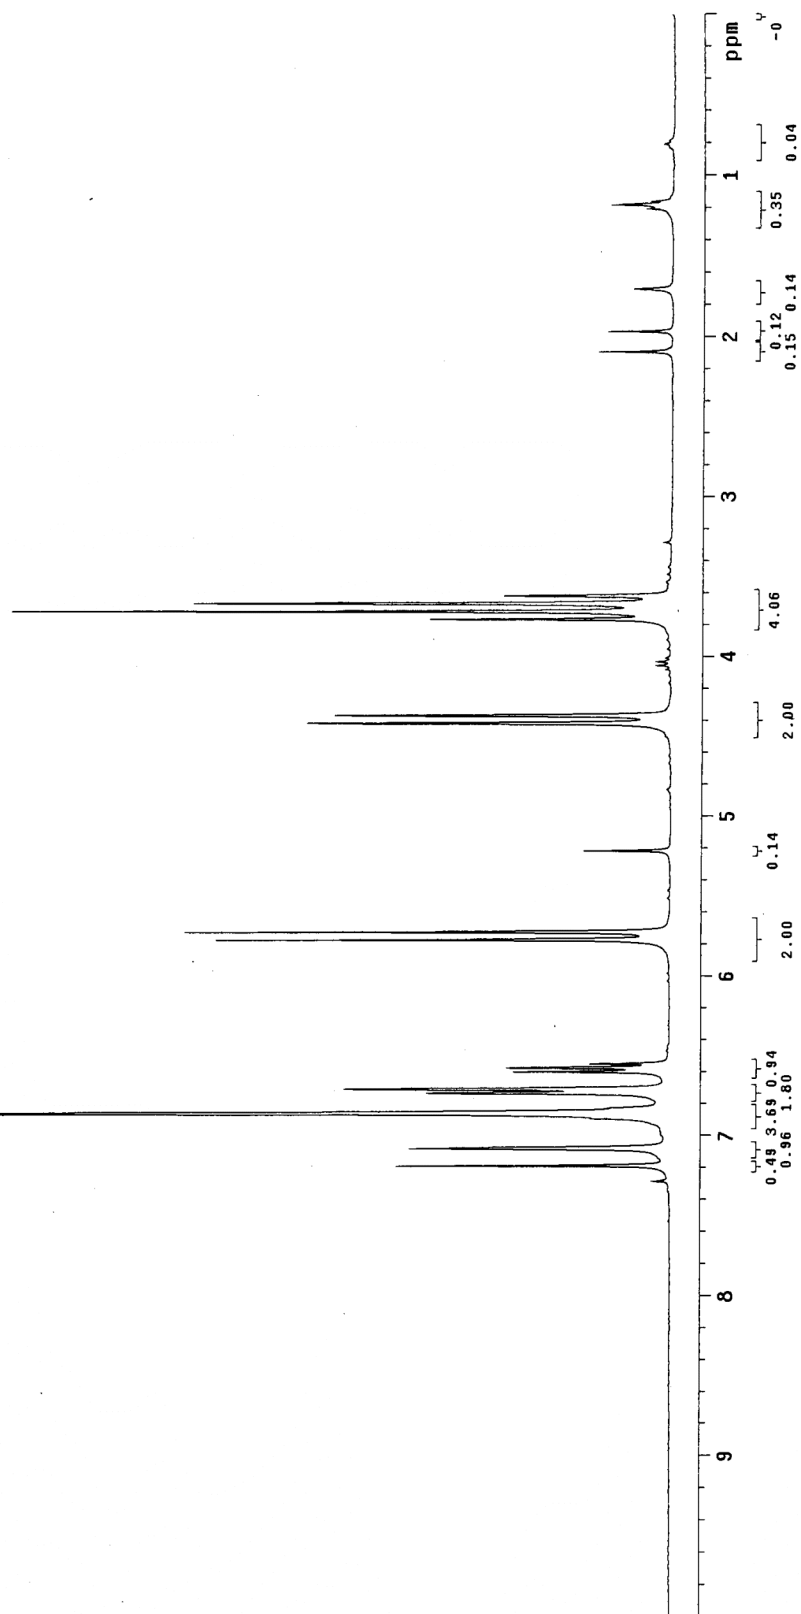

KKE2275C13

Pulse Sequence: szpul

Solvent: CDCl<sub>3</sub>

Ambient temperature

File: KKE2275C13

INOVA-500 "nmrdata.chem.buffalo.edu"

Relax. delay 5.000 sec

Pulse 30.0 degrees

Acq. time 1.706 sec

Width 18761.7 Hz

160 Repetitions

OBSERVE C13, 75.4536640 MHz

DECOUPLE H1, 300.0754431 MHz

Power 1023 dB

continuously on

WALTZ-16 modulated

DATA PROCESSING

Line broadening 1.0 Hz

FT size 65536

Total time 1 hr, 55 min, 2 sec

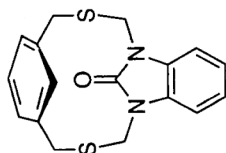

8A

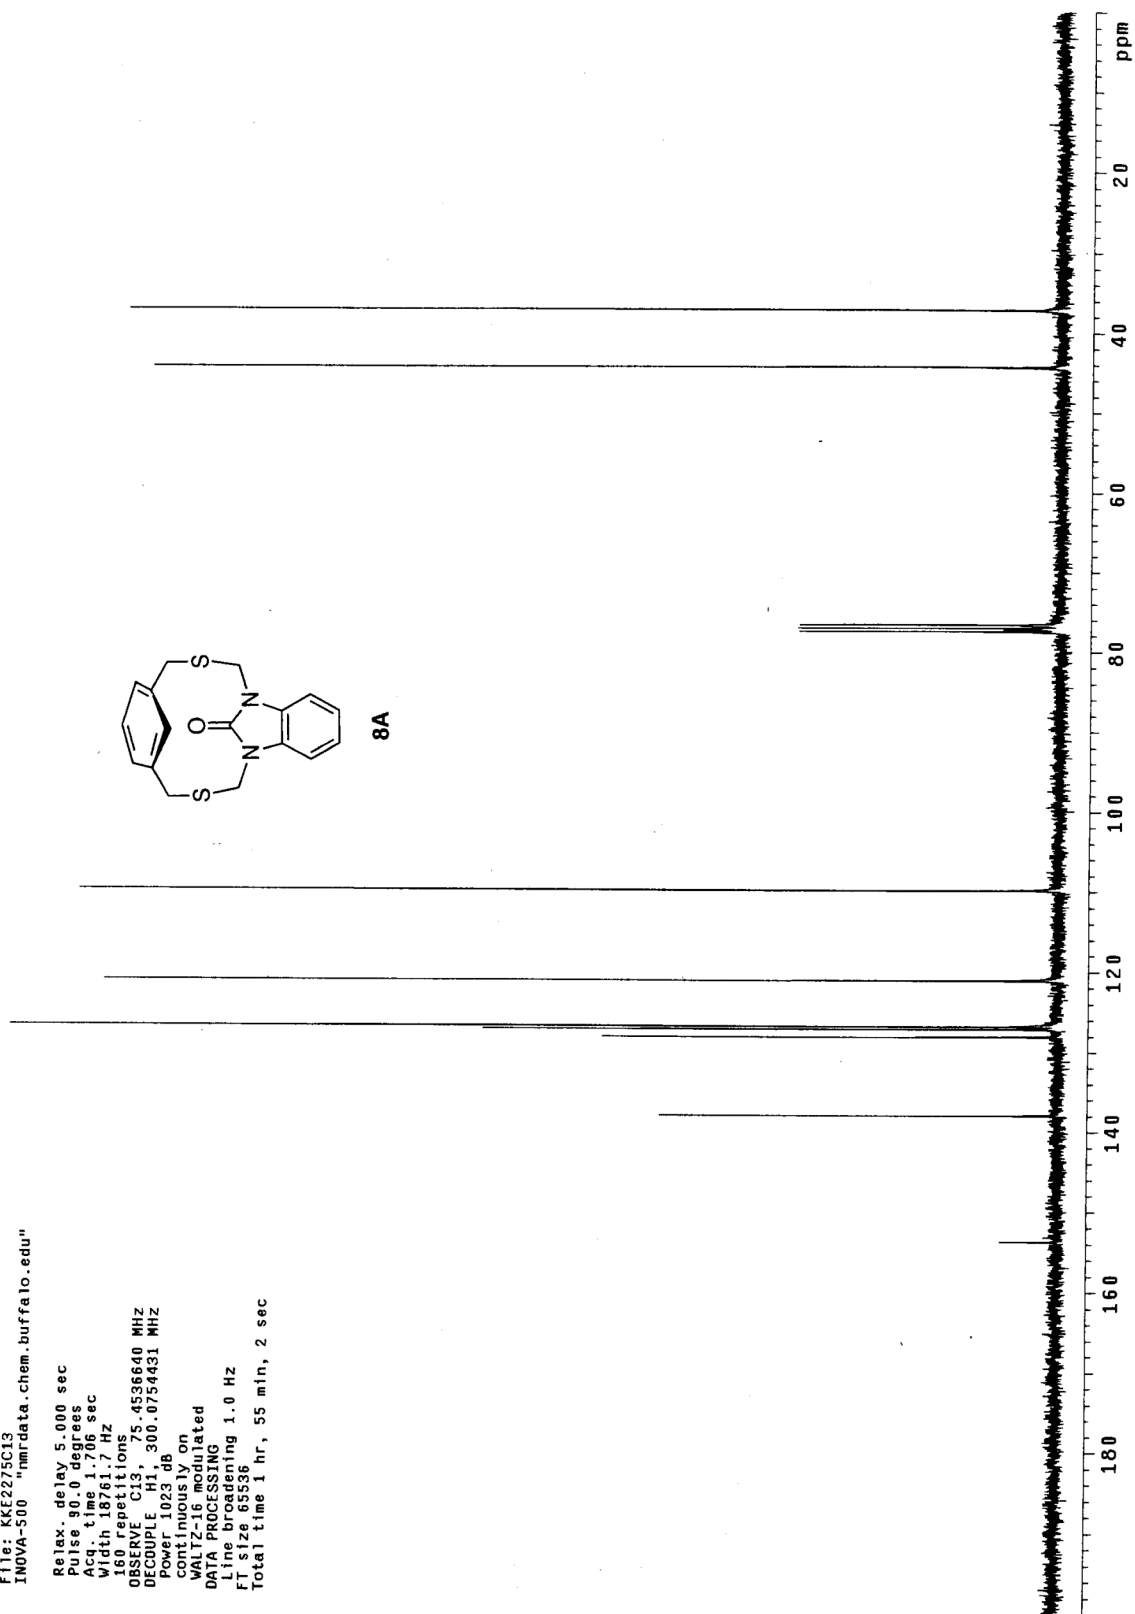

KKE3001

Pulse Sequence: szpul  
Solvent: CDCl<sub>3</sub>  
Ambient temperature  
INOVA-500 "tocsy.chem.buffalo.edu"

Relax. delay 2.000 sec  
Pulse 32.6 degrees  
Acq. time 1.98 sec  
Width 10006.0 Hz  
64 repetitions  
OBSERVE H1 499.8984065 MHz  
DATA PROCESSING  
Line broadening 0.7 Hz  
FT size 65536  
Total time 4 min, 25 sec

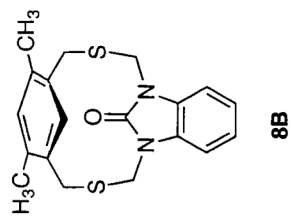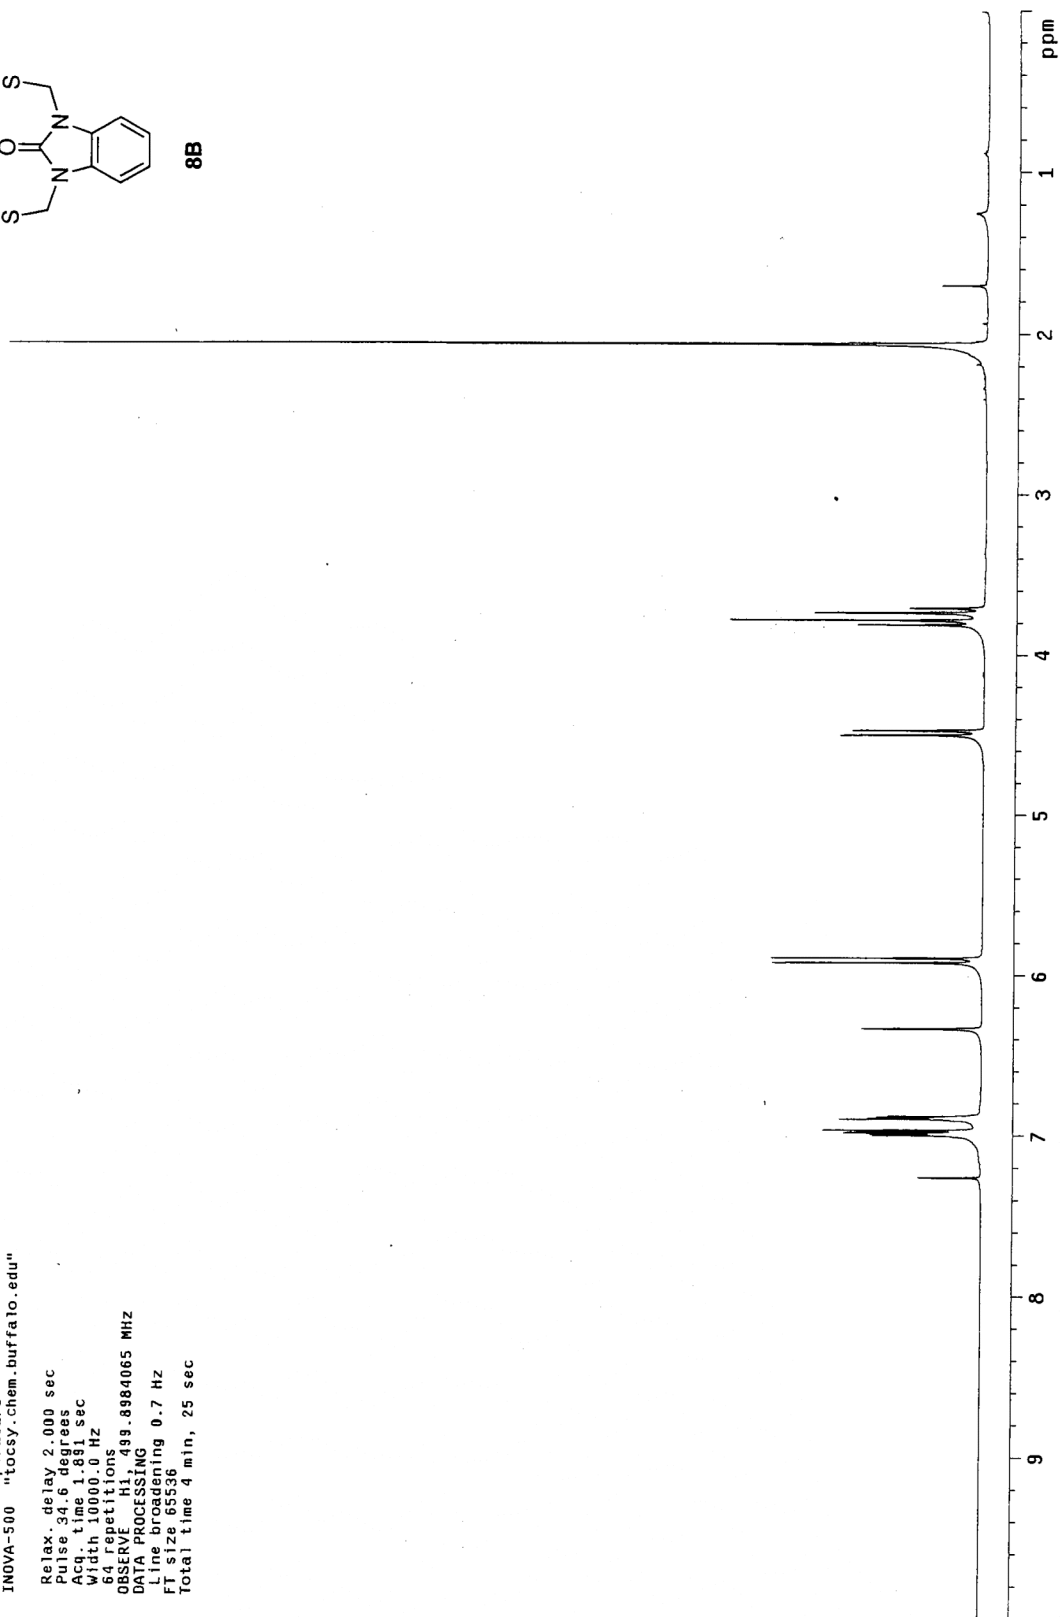

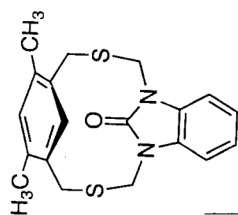

8B

KKE3001C13

Pulse Sequence: s2pul

Solvent: CDCl3

Ambient temperature

GENI-300 "foesy.Chem.buffalo.edu"

Relax. delay 5.000 sec

Pulse 90.0 degrees

Acq. time 1.706 sec

Width 18761.7 Hz

368 repetitions

OBSERVE C13, 75.4536619 MHz

DECOUPLE H1, 300.0754431 MHz

Power 1023 dB

continuously on

WALTZ16 modulated

DATA PROCESSING

Time broadening 1.0 Hz

FI size 85536

Total time 155 hr, 16 min, 13 sec

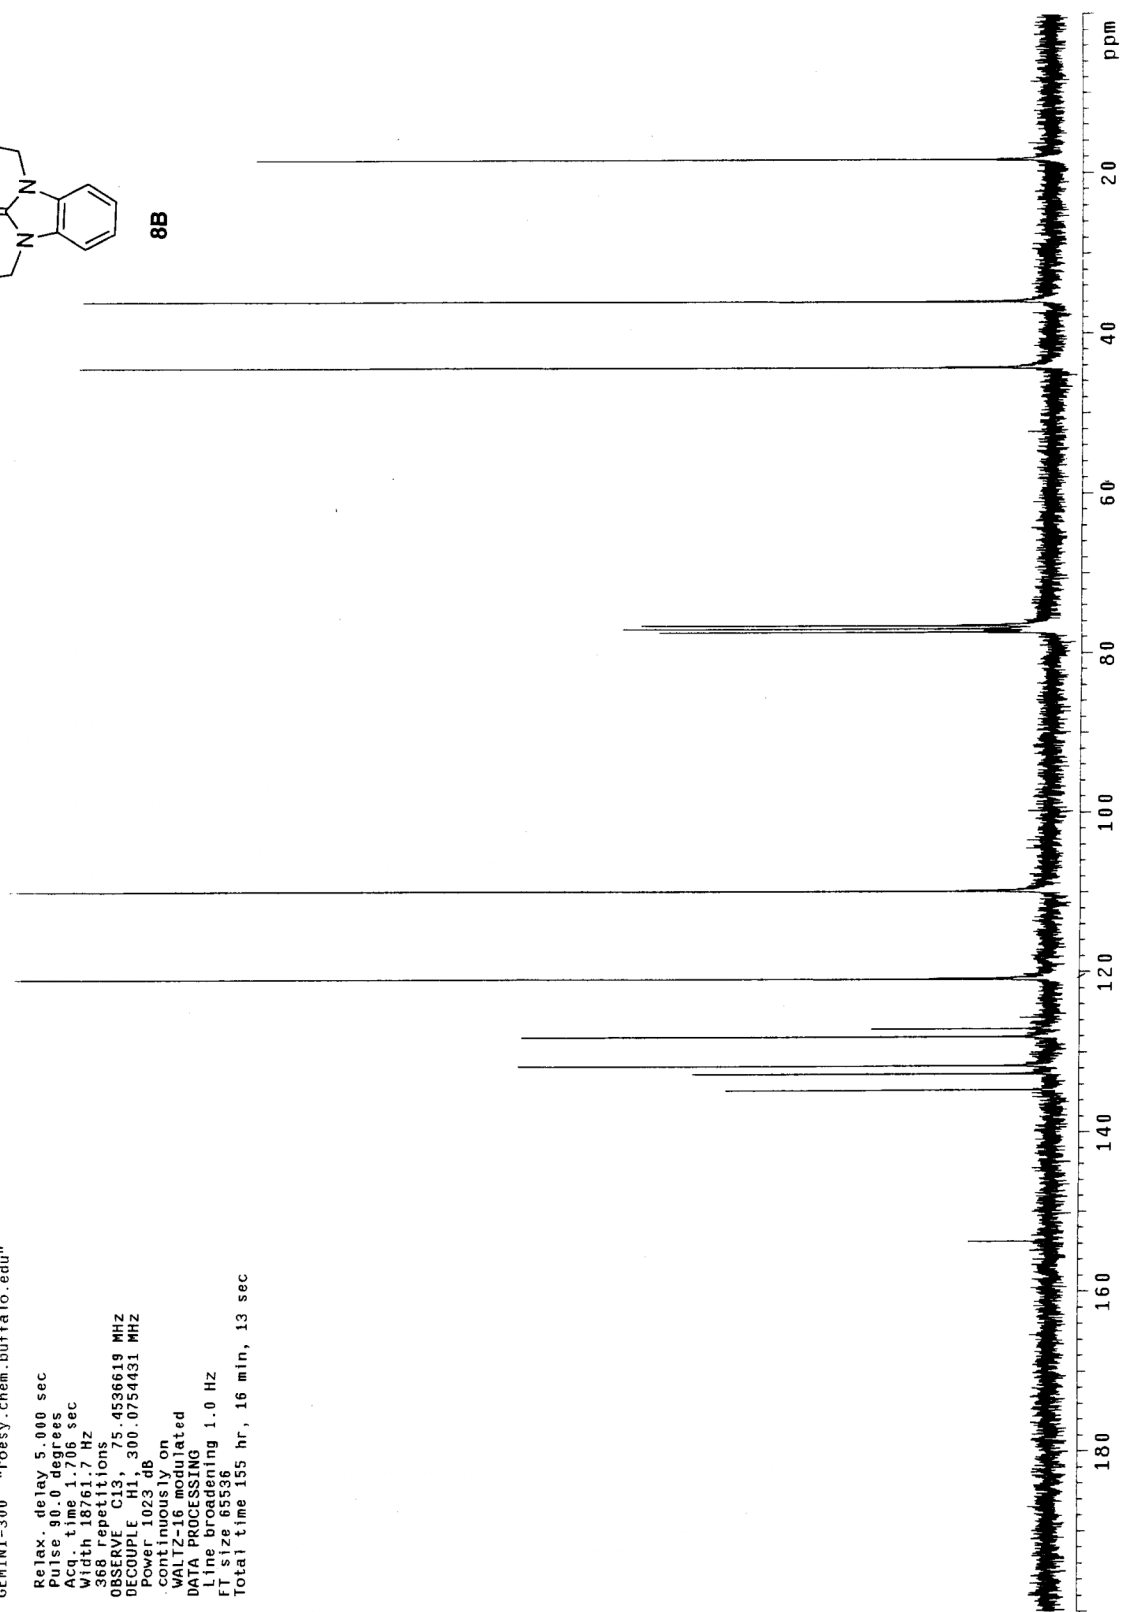

KKE2289

Pulse Sequence: s2pul  
Solvent: CDCl<sub>3</sub>  
Ambient temperature  
File: KKE2289  
GEMINI-300 "roesy.chem.buffalo.edu"

Relax. delay 5.000 sec  
Pulse 31.5 degrees  
Acq. time 1.998 sec  
Width 4500.5 Hz  
36 repetitions  
OBSERVE H1, 300.0739488 MHz  
DATA PROCESSING  
Line broadening 1.0 Hz  
FT size 32768  
Total time 8 min, 24 sec

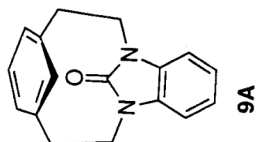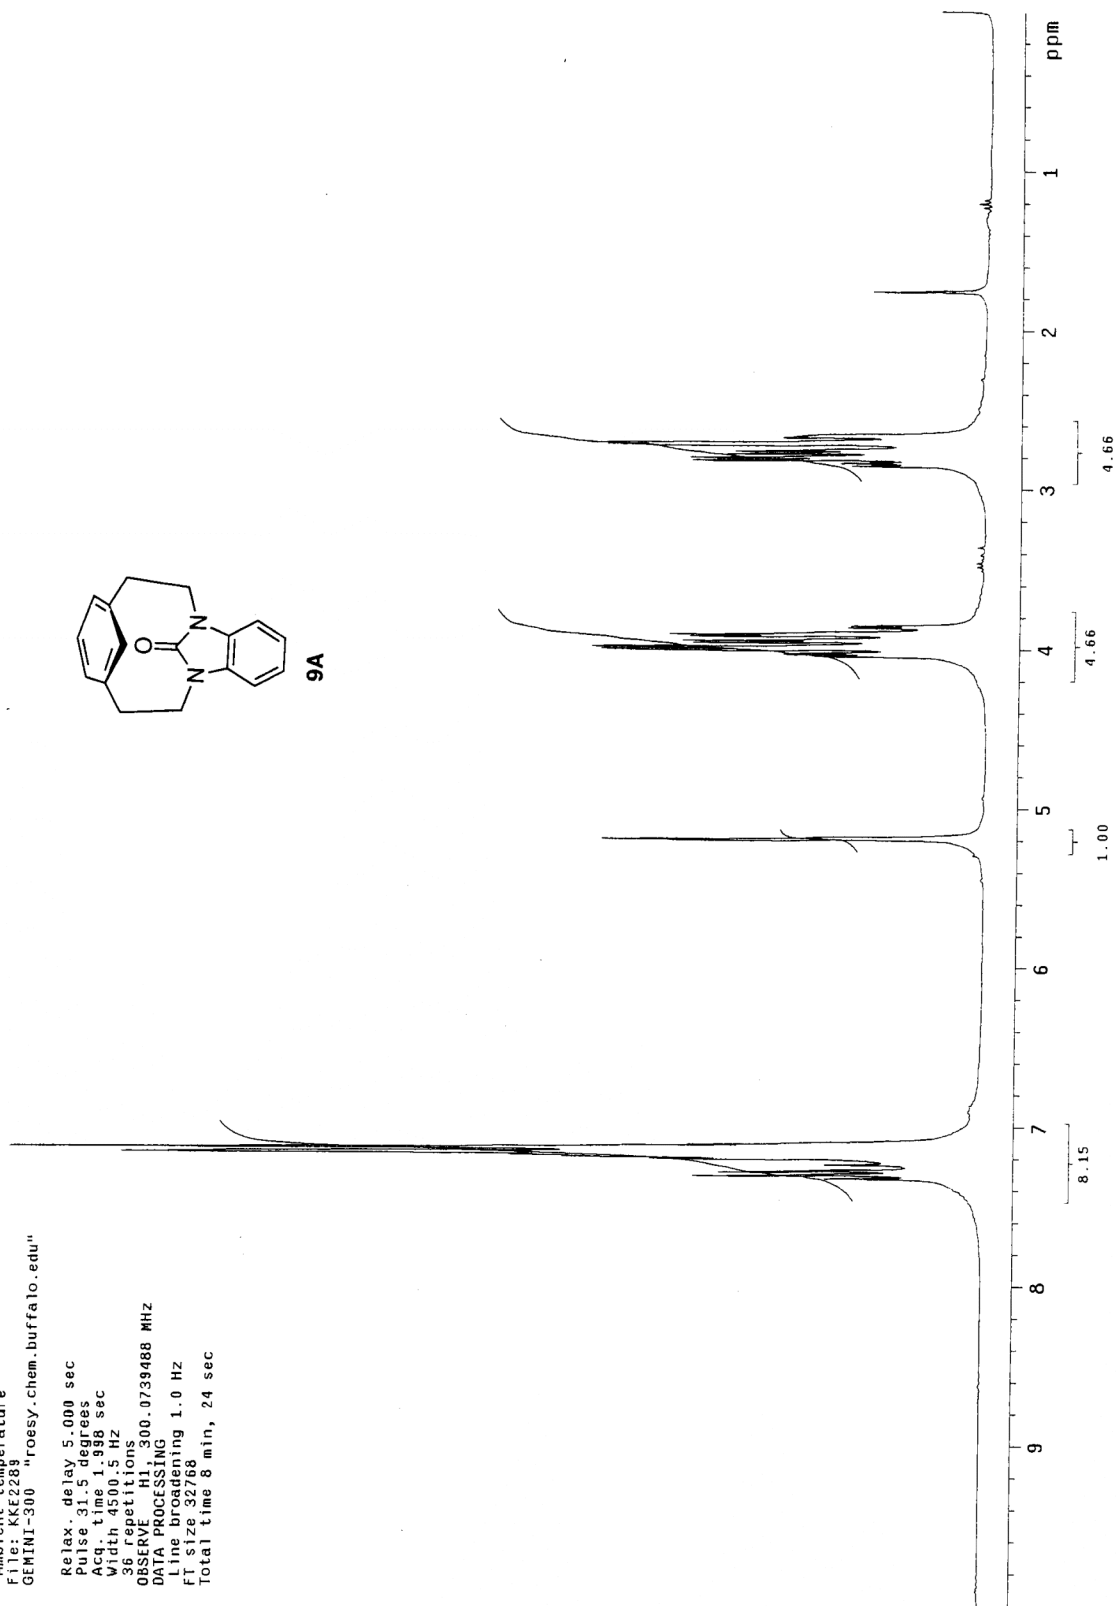



KKE2289C13

Pulse Sequence: s2pul

Solvent: CDCl<sub>3</sub>

Ambient temperature

GEMINI-300 "roesy.chem.buffalo.edu"

Relax. delay 5.000 sec

Pulse 90.0 degrees

Acq. time 1.706 sec

Width 1861.7 Hz

640 repetitions

OBSERVE C13, 75.4536664 MHz

DECOUPLE H1, 300.0754431 MHz

Power 1023 dB

continuously on

WALTZ-16 modulated

DATA PROCESSING

Line broadening 1.0 Hz

FT size 65536

Total time 12 hr, 25 min, 57 sec

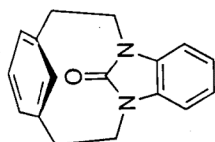

9A

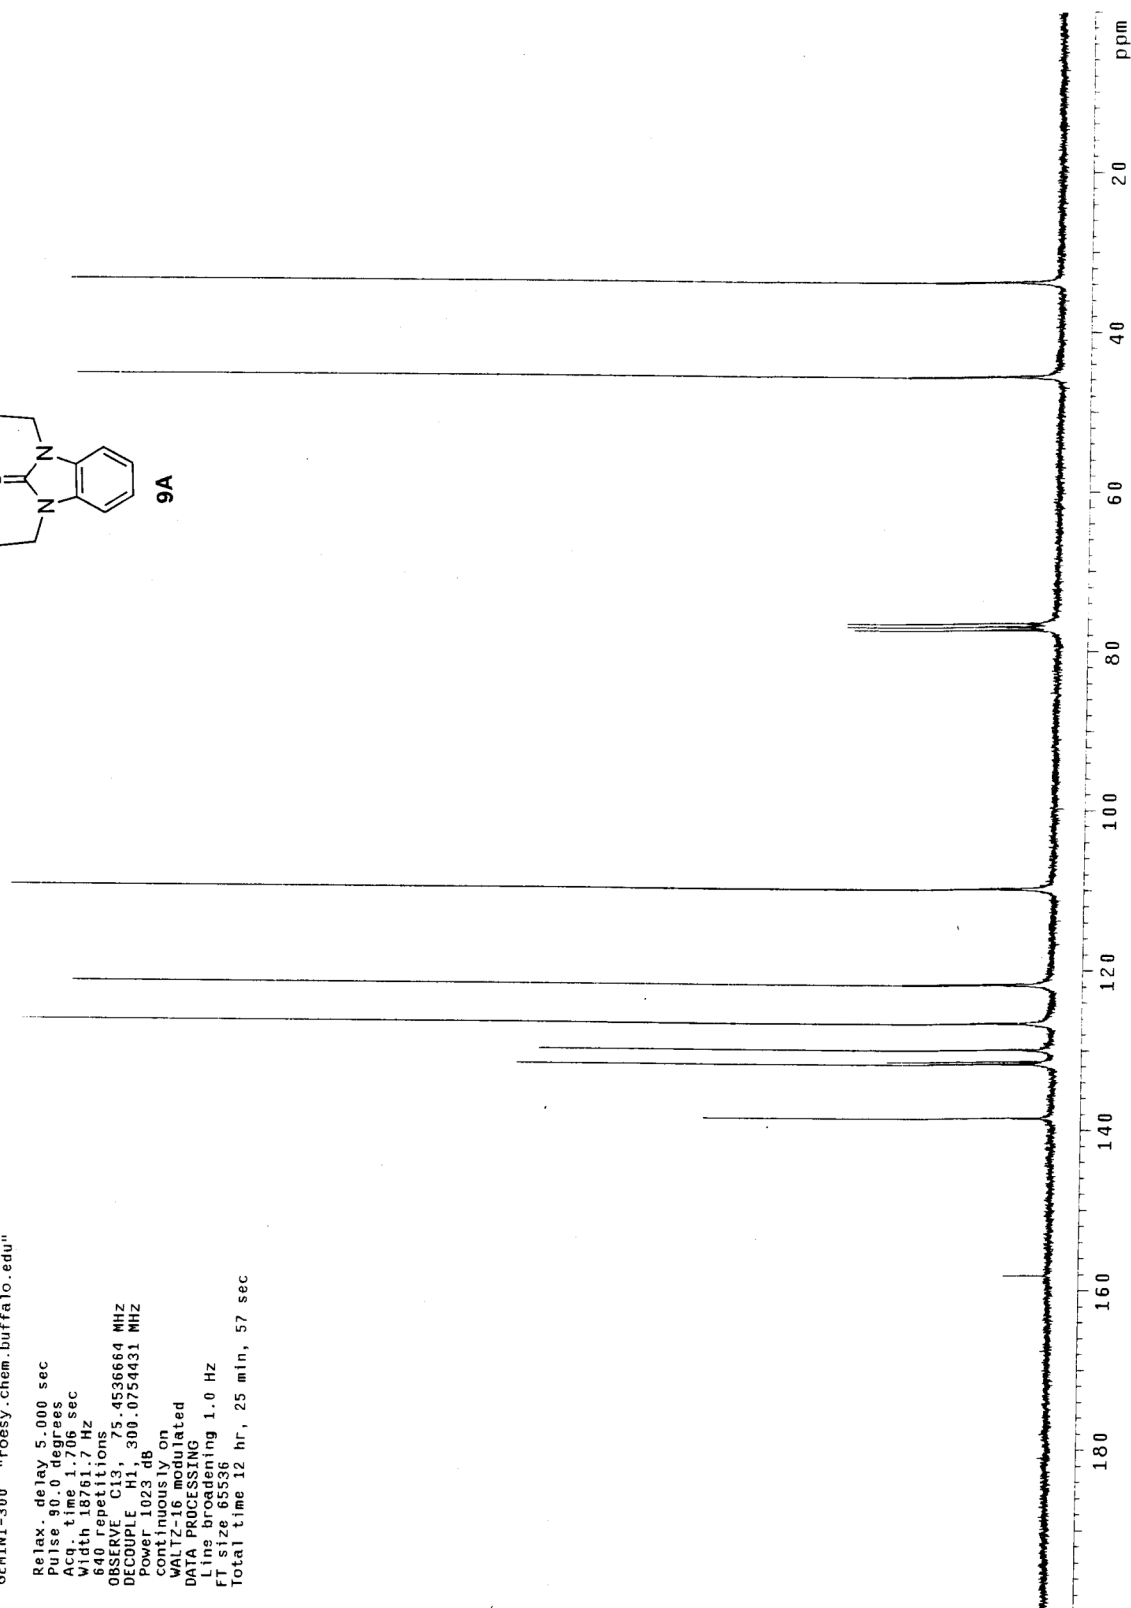

KKE3021

Pulse Sequence: szpul  
 Solvent: CDCl3  
 Ambient temperature  
 INOVA-500 "tocsy.chem.buffalo.edu"

Relax. delay 2.000 sec  
 Pulse 34.6 degrees  
 Acq. time 1.881 sec  
 Width 10000.0 Hz  
 16 Spectitions  
 OBSERVE 1H  
 DATA PROCESSING 99.8884245 MHz  
 Line broadening 0.7 Hz  
 FT size 85536  
 Total time 1 min, 18 sec

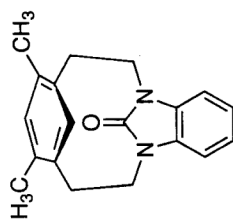

9B

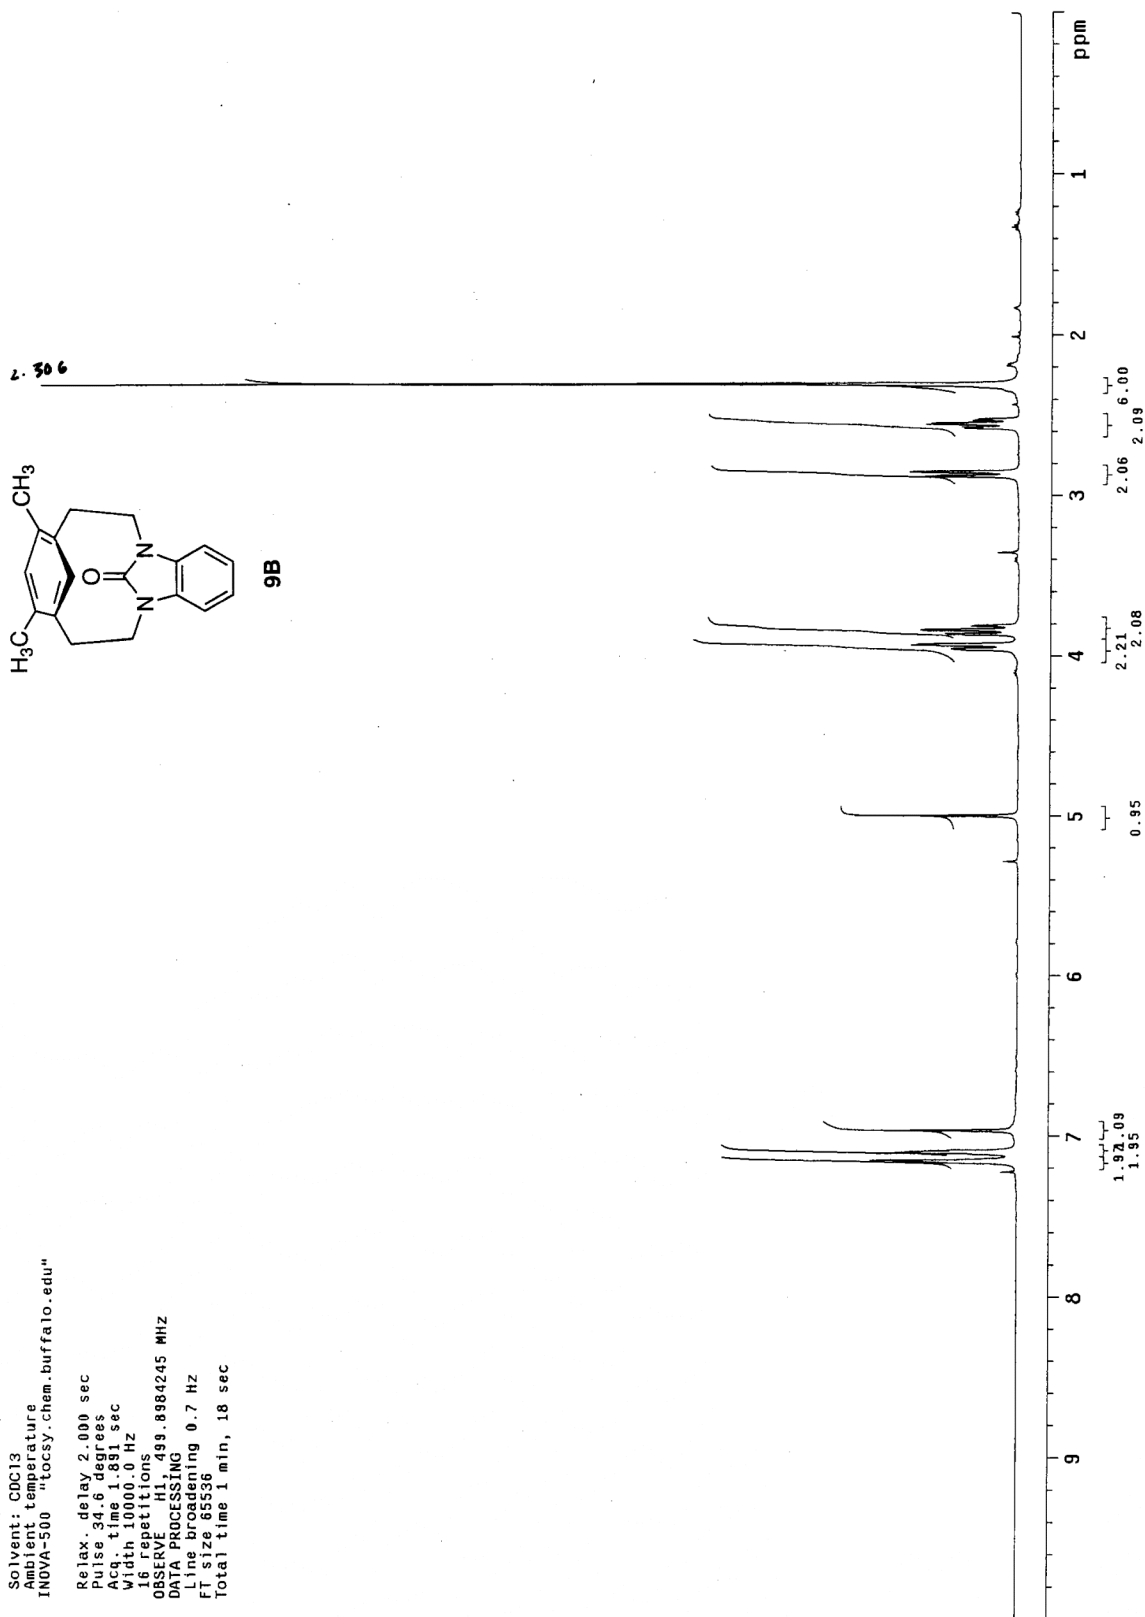

KKE3021C13

Pulse Sequence: s2pul  
Solvent: CDCl3  
Ambient temperature  
GEMINI-300 "f0esy.Chem.buffalo.edu"

Relax. delay 5.000 sec  
Pulse 90.0 degrees  
Acq. time 1.706 sec  
248th 18761.7 Hz  
Repetitions 5  
OBSERVE C13, 75.4536689 MHz  
DECOUPLE H1, 300.0754431 MHz  
Power 1023.148  
continuously on  
WALTZ-16 modulated  
DATA PROCESSING  
Line broadening 1.0 Hz  
FT size 65536  
Total time 1 hr, 59 min, 57 sec

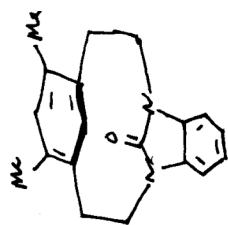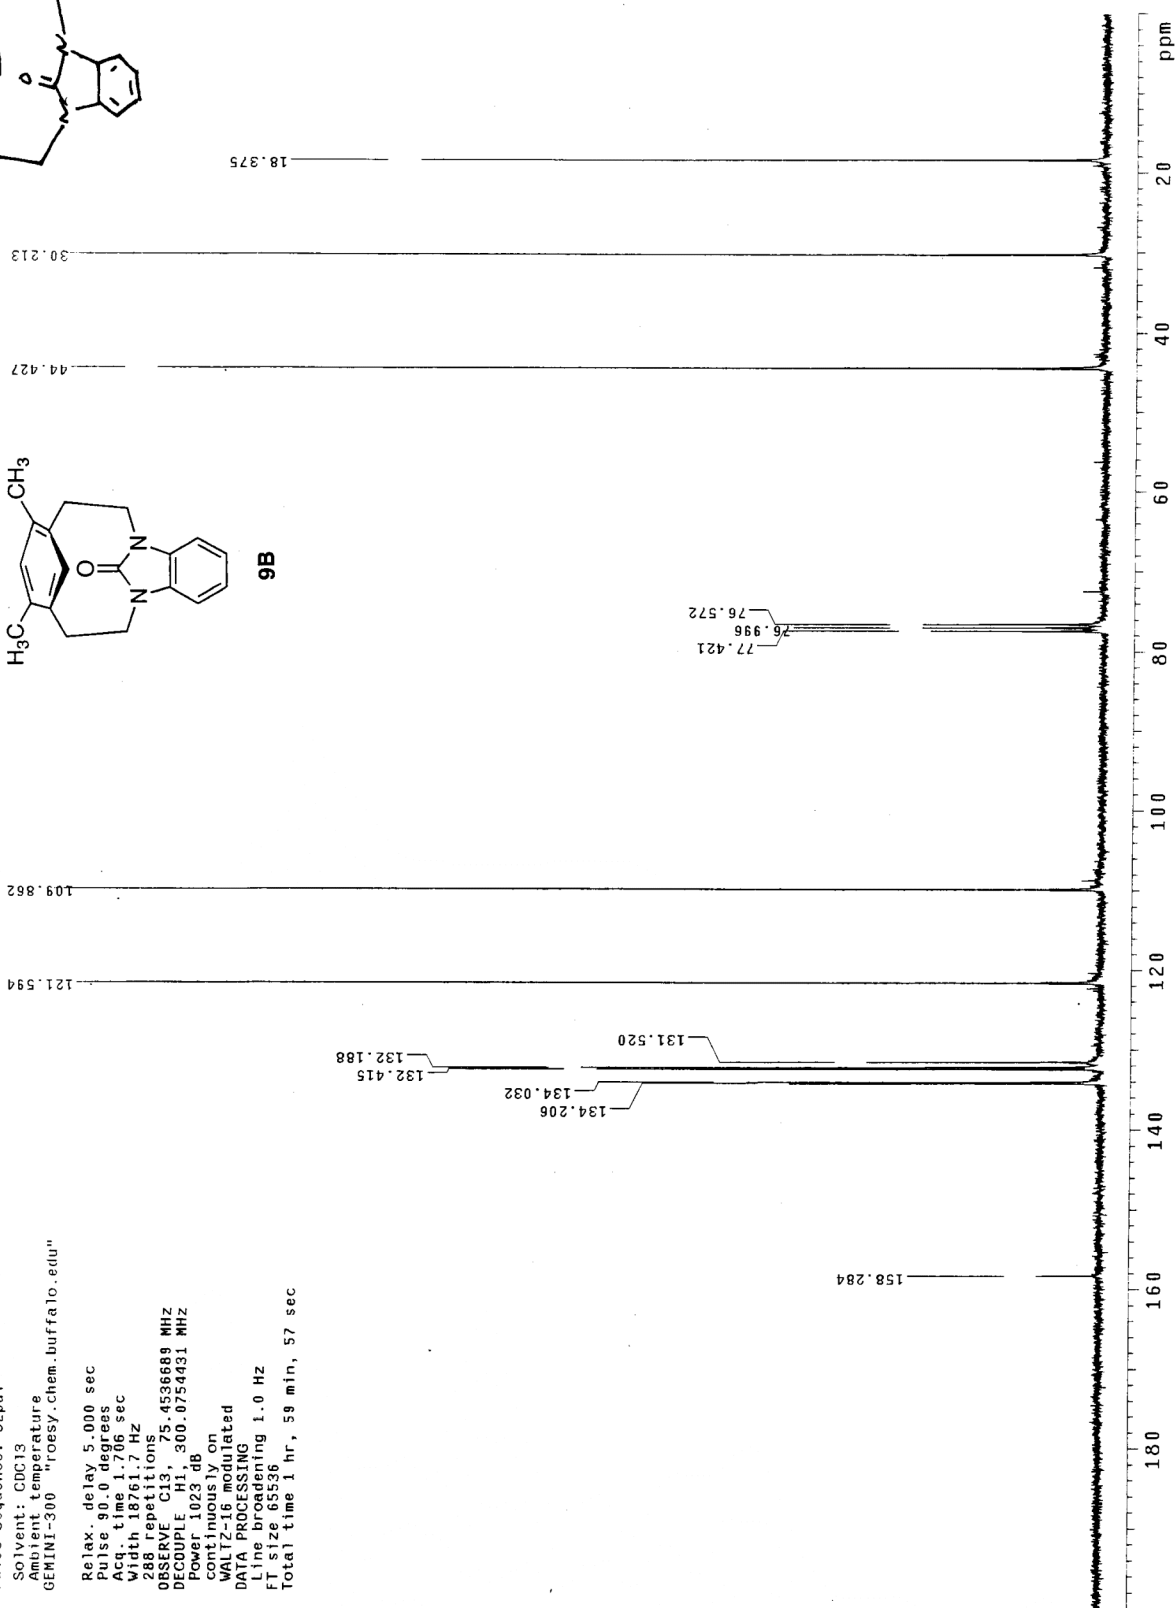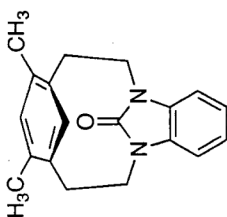

9B
